# Supplementary material for: Farmland practices are driving bird population decline across Europe
Source: PubMed Central journal article supplement (PMC10214186; doi:10.1073/pnas.2216573120), 2023-05-15
Supplement: pnas.2216573120.sapp.pdf [file pnas.2216573120.sapp.pdf]

## Supporting Information for

### Farmland practices are driving bird populations decline across Europe

Stanislas Rigal, Vasilis Dakos, Hany Alonso, Ainārs Auniņš, Zoltán Benkő, Lluís Brotons, Tomasz Chodkiewicz, Przemysław Chylarecki, Elisabetta de Carli, Juan Carlos del Moral, Cristian Domşa, Virginia Escandell, Benoît Fontaine, Ruud Foppen, Richard Gregory, Sarah Harris, Sergi Herrando, Magne Husby, Christina Ieronymidou, Frederic Jiguet, John Kennedy, Alena Klvaňová, Primož Kmecl, Lechosław Kuczyński, Petras Kurlavičius, John Atle Kålås, Aleksi Lehikoinen, Åke Lindström, Romain Lorrillière, Charlotte Moshøj, Renno Nellis, David Noble, Daniel Palm Eskildsen, Jean-Yves Paquet, Mathieu Pelissié, Clara Pladevall, Danae Portolou, Jiří Reif, Hans Schmid, Benjamin Seaman, Zoltán D. Szabo, Tibor Szép, Guido Tellini Florenzano, Norbert Teufelbauer, Sven Trautmann, Chris van Turnhout, Zdeněk Vermouzek, Thomas Vikstrøm, Petr Voříšek, Anne Weiserbs, Vincent Devictor.

Corresponding author: Stanislas Rigal

Email: [stanislas.rigal@ens-lyon.fr](mailto:stanislas.rigal@ens-lyon.fr)

#### This PDF file includes:

Supplementary Information Appendix 1

Figure S1

Supporting text

Table S1

Supplementary Information Appendix 2

Table S2 to S3

Figure S2

Supplementary Information Appendix 3

Figures S3 to S4

Supplementary Information Appendix 4

Figure S5

Supplementary Information Appendix 5

Tables S4 to S10

Supplementary Information Appendix 6

Figure S6

Supplementary Information Appendix 7

Tables S11 to S15

Figure S7

Supplementary Information Appendix 8

Figure S8

SI References

## Supplementary Information Appendix 1

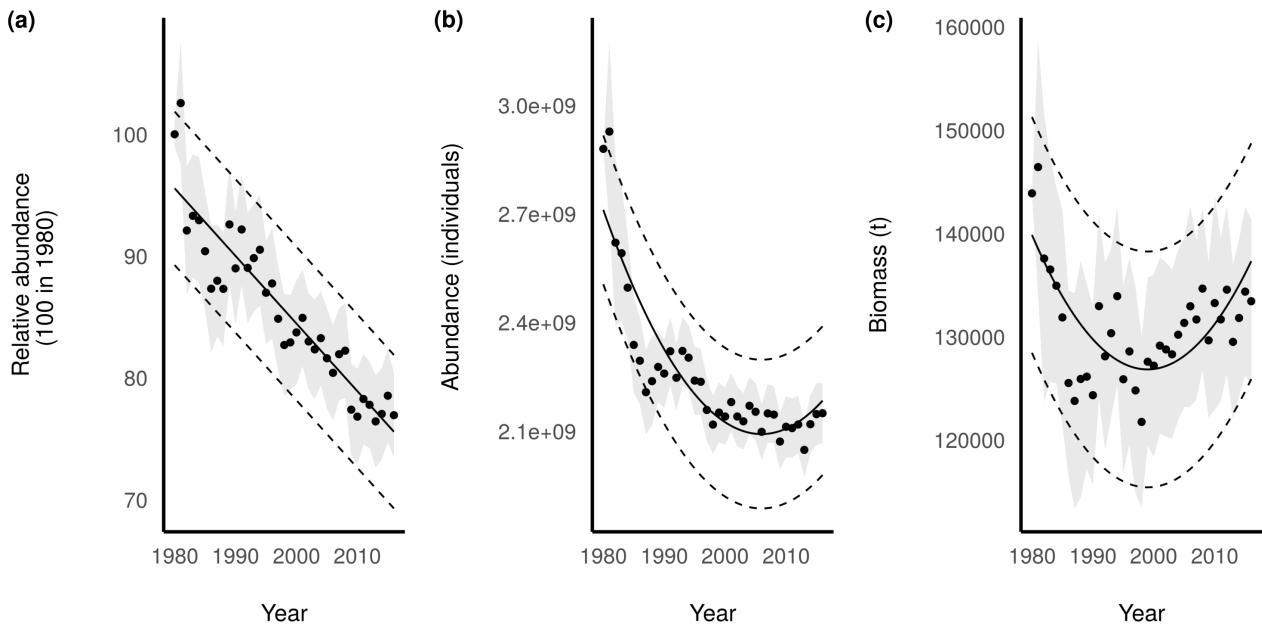

Figure S1: Multispecies index, abundance and biomass (see methods below) of all the 115 common bird species (used for supranational indices among the 170 species) between 1980 and 2016. a) The relative abundance multispecies index is calculated by attributing a common weight to each species whatever their abundance or biomass and shows that a majority of species have been declining. b) Abundance corresponds to the number of individuals and it is discussed in the paper and used as referenced in this figure. Biomass was obtained by multiplying the average weight of each species by the abundance. c) Biomass trajectory shows a convex shape interpreted as an increase of protected and rare birds (often heavy species) whereas more common (and light) ones were decreasing.

Supporting text: Supplementary Method for species abundance

In addition to the Species Abundance Index (SAI) which corresponds to a relative value, estimated numbers of breeding pairs by countries were manually extracted from the European Red List of Birds fact-sheets available on Birdlife Data Zone to evaluate annual absolute abundance (1). The geometric mean of the minimum and maximum number of species pairs was multiplied by two to obtain the number of individuals. This gave us an estimate of each countrywide species population size in a breeding season. Population estimates stem from survey data with average starting and ending years being 2007 and 2011 respectively. They are considered as proxies of the population size at the ending year

(e.g. population of *Anthus trivialis* in France was estimated at 529 150 individuals at the ending year 2012 in Birdlife). To obtain population size for each year, we used the SAI corresponding to relative variations in abundance compared to a reference year (e.g. 1989 for *A. trivialis* in France). SAI values are scaled with the reference year value set at 100. The population size at the ending year was divided by the SAI value at the ending year (e.g. in 2012 for *A. trivialis* in France, SAI=72 (se=17)) (or at the first or last year, if population size was estimated before or after the period covered by the PECBMS, respectively). This resulted in a weighing factor (e.g. here  $529\ 150/72=7349$ ) which was then used to multiply SAI values to get the absolute abundance (and its standard errors) of the population for each year. This was repeated for each of the 170 species and in each of the 28 countries.

| Period    | Slope                | Pvalue                | Significant decline |
|-----------|----------------------|-----------------------|---------------------|
| 1980-2016 | -1.5.10 <sup>7</sup> | 1.1.10 <sup>-09</sup> | Yes                 |
| 1981-2016 | -1.2.10 <sup>7</sup> | 1.4.10 <sup>-08</sup> | Yes                 |
| 1982-2016 | -1.0.10 <sup>7</sup> | 2.4.10 <sup>-08</sup> | Yes                 |
| 1983-2016 | -8.9.10 <sup>6</sup> | 1.8.10 <sup>-07</sup> | Yes                 |
| 1984-2016 | -7.8.10 <sup>6</sup> | 8.6.10 <sup>-07</sup> | Yes                 |
| 1985-2016 | -6.7.10 <sup>6</sup> | 1.5.10 <sup>-05</sup> | Yes                 |
| 1986-2016 | -6.5.10 <sup>6</sup> | 5.7.10 <sup>-05</sup> | Yes                 |
| 1987-2016 | -6.4.10 <sup>6</sup> | 1.9.10 <sup>-04</sup> | Yes                 |
| 1988-2016 | -7.0.10 <sup>6</sup> | 2.3.10 <sup>-05</sup> | Yes                 |
| 1989-2016 | -7.2.10 <sup>6</sup> | 2.2.10 <sup>-06</sup> | Yes                 |
| 1990-2016 | -7.0.10 <sup>6</sup> | 8.4.10 <sup>-06</sup> | Yes                 |
| 1991-2016 | -7.1.10 <sup>6</sup> | 7.4.10 <sup>-06</sup> | Yes                 |
| 1992-2016 | -6.5.10 <sup>6</sup> | 6.0.10 <sup>-05</sup> | Yes                 |
| 1993-2016 | -6.4.10 <sup>6</sup> | 2.0.10 <sup>-04</sup> | Yes                 |
| 1994-2016 | -5.2.10 <sup>6</sup> | 1.3.10 <sup>-03</sup> | Yes                 |
| 1995-2016 | -4.2.10 <sup>6</sup> | 8.4.10 <sup>-03</sup> | Yes                 |
| 1996-2016 | -3.3.10 <sup>6</sup> | 4.3.10 <sup>-02</sup> | Yes                 |
| 1997-2016 | -3.3.10 <sup>6</sup> | 4.3.10 <sup>-02</sup> | Yes                 |
| 1998-2016 | -2.4.10 <sup>6</sup> | 1.0.10 <sup>-01</sup> | No                  |
| 1999-2016 | -2.4.10 <sup>6</sup> | 1.3.10 <sup>-01</sup> | No                  |
| 2000-2016 | -2.5.10 <sup>6</sup> | 1.4.10 <sup>-01</sup> | No                  |
| 2001-2016 | -2.8.10 <sup>6</sup> | 1.5.10 <sup>-01</sup> | No                  |
| 2002-2016 | -2.8.10 <sup>6</sup> | 1.7.10 <sup>-01</sup> | No                  |
| 2003-2016 | -2.1.10 <sup>6</sup> | 3.7.10 <sup>-01</sup> | No                  |
| 2004-2016 | -1.7.10 <sup>6</sup> | 4.9.10 <sup>-01</sup> | No                  |
| 2005-2016 | -2.6.10 <sup>6</sup> | 3.8.10 <sup>-01</sup> | No                  |
| 2006-2016 | -5.5.10 <sup>4</sup> | 7.1.10 <sup>-01</sup> | No                  |

Table S1: Slope of a linear regression of the overall bird abundance trajectory and time period considered.

## Supplementary Information Appendix 2

### 1. Detailed results of PLS

|                             | Component 1 | Component 2 |
|-----------------------------|-------------|-------------|
| R <sup>2</sup>              | 0.01        | 0.01        |
| High-input farm cover       | -0.57       | 0.01        |
| High-input farm cover trend | -0.32       | -0.54       |
| Forest cover                | 0.29        | -0.42       |
| Forest cover trend          | 0.03        | -0.08       |
| Urbanisation                | -0.38       | 0.36        |
| Urbanisation trend          | -0.55       | -0.01       |
| Temperature                 | 0.14        | 0.52        |
| Temperature trend           | -0.08       | -0.34       |

Table S2: Detailed results of the Partial Least Square Regression between bird population trends and pressures. The variance explained by each of the two selected component is given by R<sup>2</sup> and the normed weight of each explanatory variable in each component is provided.

### 2. Interaction terms in PLS

| Interaction term                               | Mean of interaction effect | CI inf | CI sup |
|------------------------------------------------|----------------------------|--------|--------|
| High input farm trend in high input farm       | * 0.045                    | 0.019  | 0.073  |
| Forest cover trend in forest cover             | * 0.009                    | 0      | 0.018  |
| Urbanisation cover trend in urbanisation cover | * -0.004                   | -0.018 | 0.009  |
| Temperature trend in temperature               | * 0.013                    | 0.005  | 0.019  |

Table S3: Interaction effects between pressures and pressure trends. Interaction effects are computed one by one (as the addition of an interaction terms change the interpretation of effects of other terms) via a Partial Least Square Regression between national bird species trend and the four explanatory variables (high-input farm cover and its temporal trend, forest cover and its temporal trend, urbanisation and its temporal trend, and temperature and its temporal trend). Lower and upper boundaries of bias-corrected and accelerated confidence interval (CI) are provided.

Overall, adding interactive terms does not change the sign, only the magnitude of the main terms. The interactive terms are only significant for high input cover and temperature (Tab S3). They show that the negative effect of high input cover change is less important when high input cover is already high, and the negative effect of temperature trend is less important when the average temperature is already high.

### 3. Effect of another component of agricultural intensification: farm size

We obtained data on farm size from the Farm structure dataset available from the European Statistics (2). We calculated the ratio of the number of small farms (< 5 ha) to the number of large farms (> 50 ha) in order to obtain a value that is independent of the total number of farms and the utilised agricultural area of each country. By incorporating this term into the PLS analysis (Fig. S2), we found a positive effect of having a high number of small farms compared to the number of large farms.

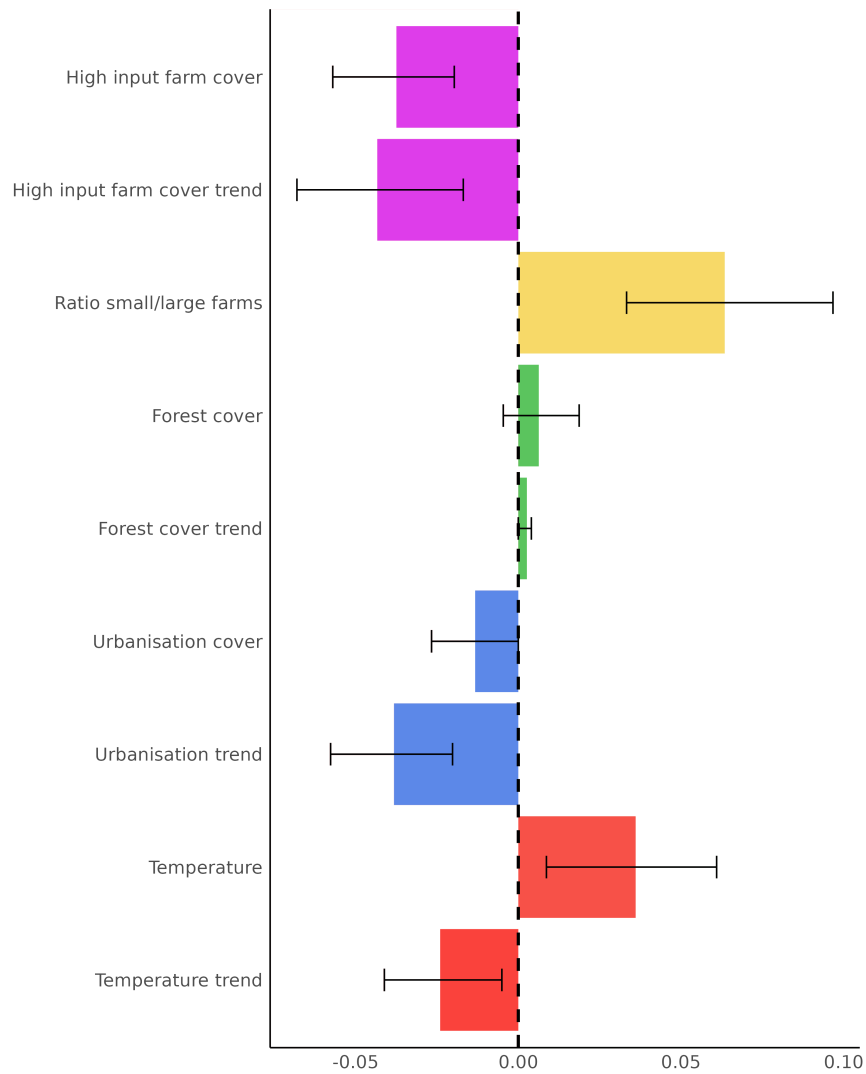

Figure S2: Relationship between anthropogenic pressure and bird trends and time-series. a) Relative effects of high-input farm cover, farm size, forest cover, urbanisation, temperature and their trends on bird trends (1996-2016, 141 species) obtained by partial least square regression (PLS). Bias-corrected and accelerated confidence intervals are displayed. The ratio of small/large farms corresponds to the number of farms < 5 ha to the number of farms > 50 ha.



### Supplementary Information Appendix 3

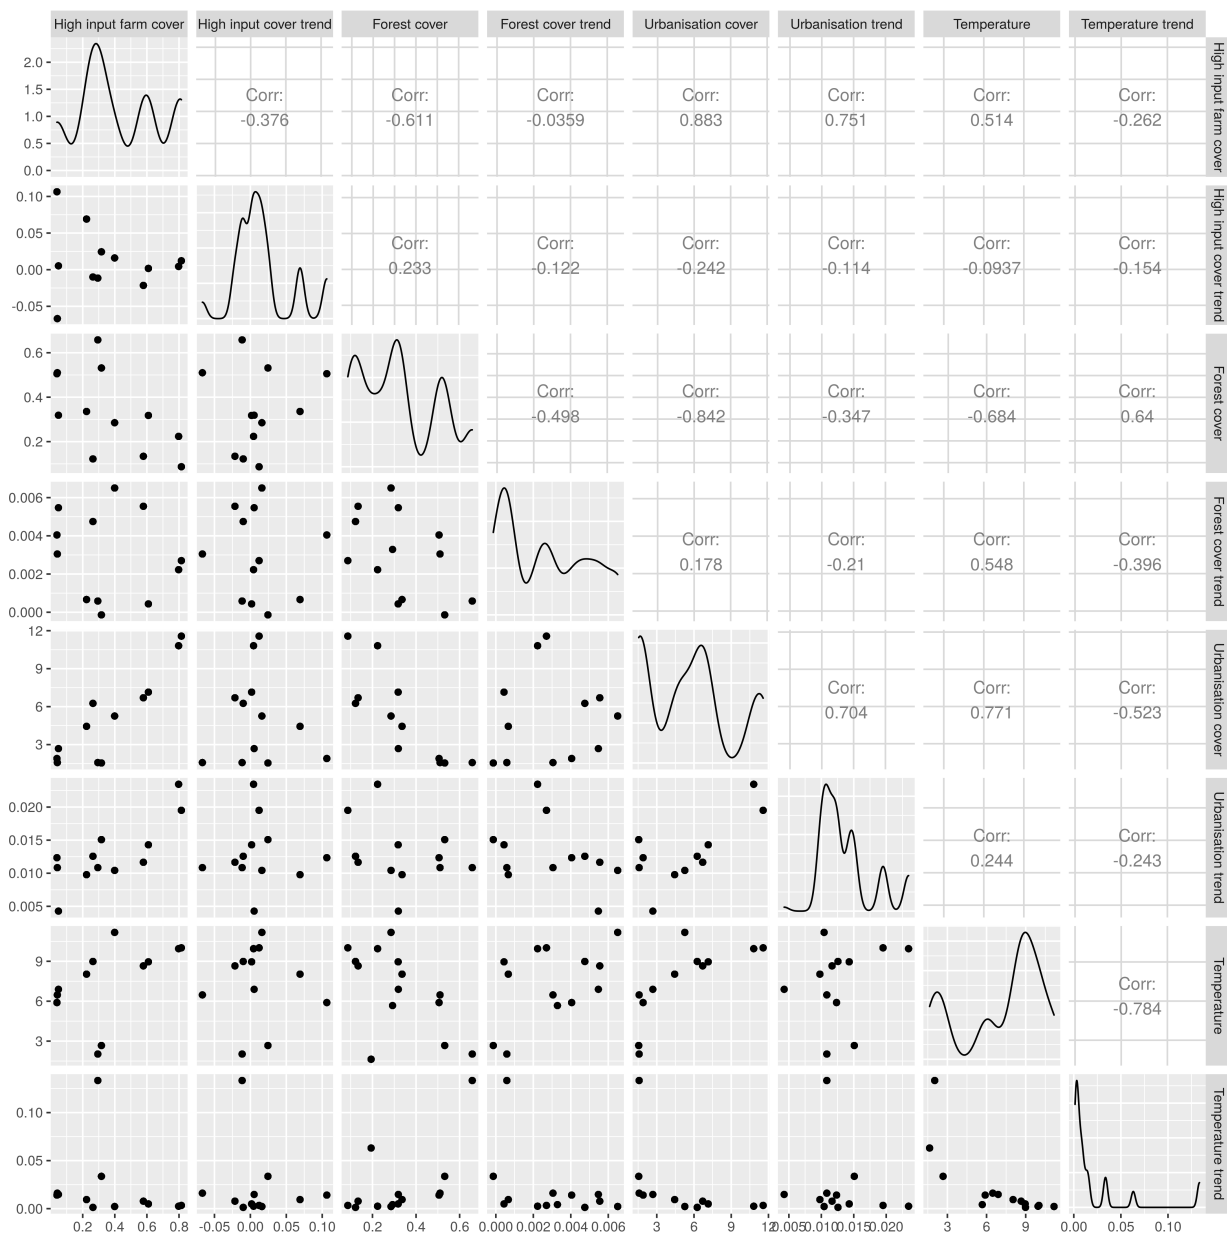

Figure S3: Density plots and correlations between anthropogenic pressures (means and trends): high-input farm cover, forest cover, urbanisation and temperature change. Each dot represents a country.

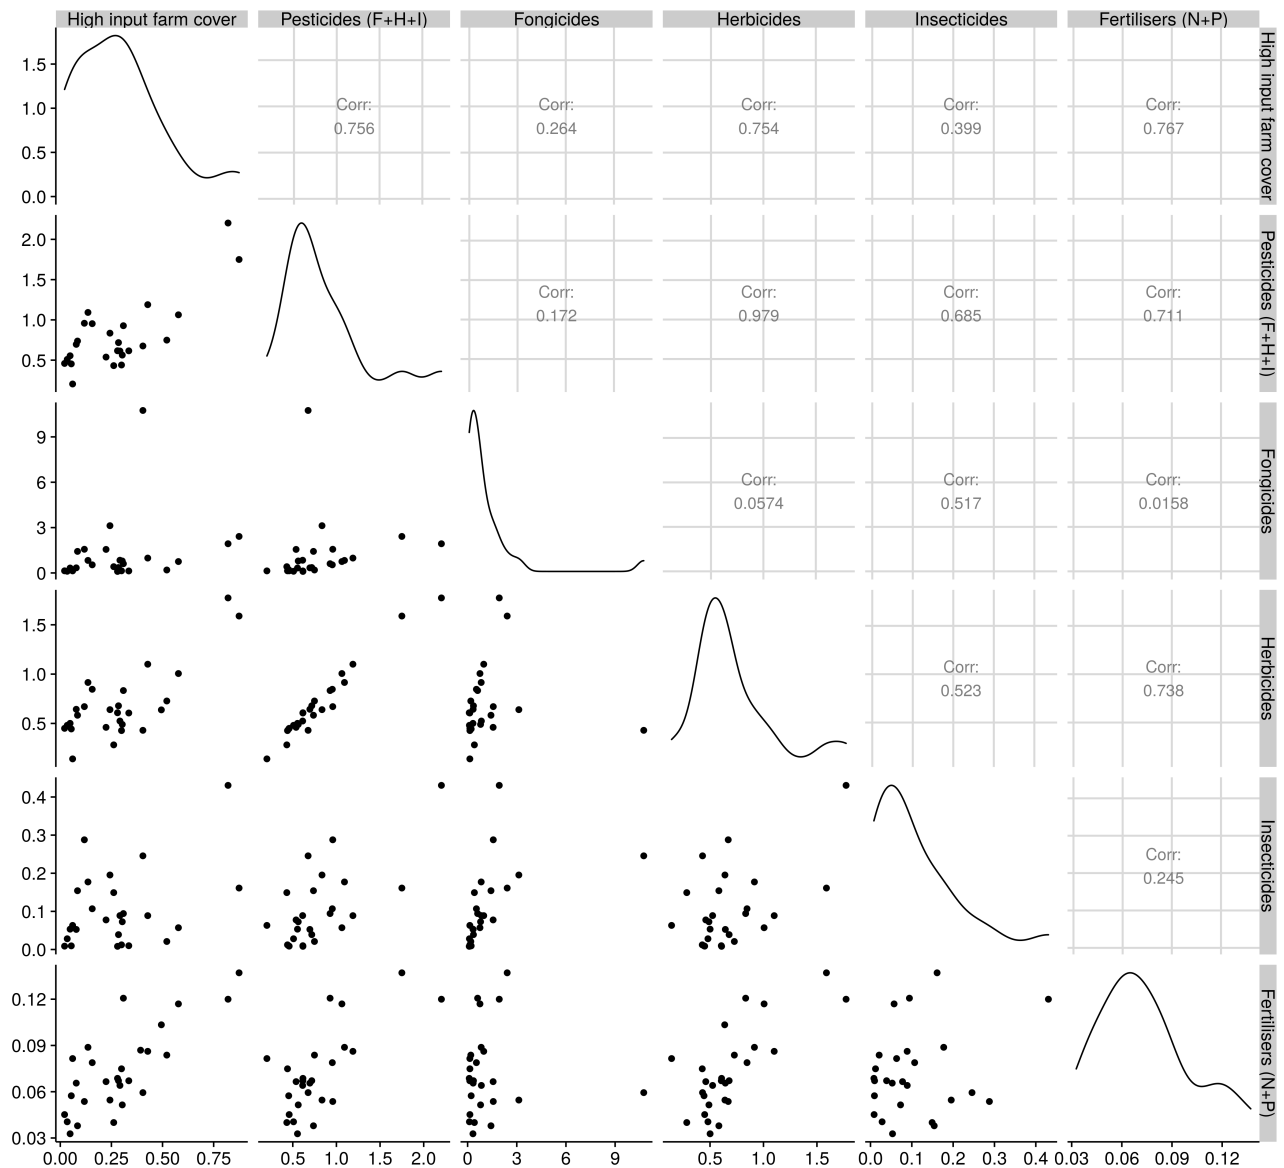

Figure S4: Correlations between high-input farm cover, pesticide sales and fertiliser consumption for European countries. Pesticides correspond to the total amount of herbicides, insecticides, fungicides sold per hectare. Fertilisers correspond to the total amount of nitrogen and phosphorus applied per hectare. Each dot represents a country.

Supplementary Information Appendix 4

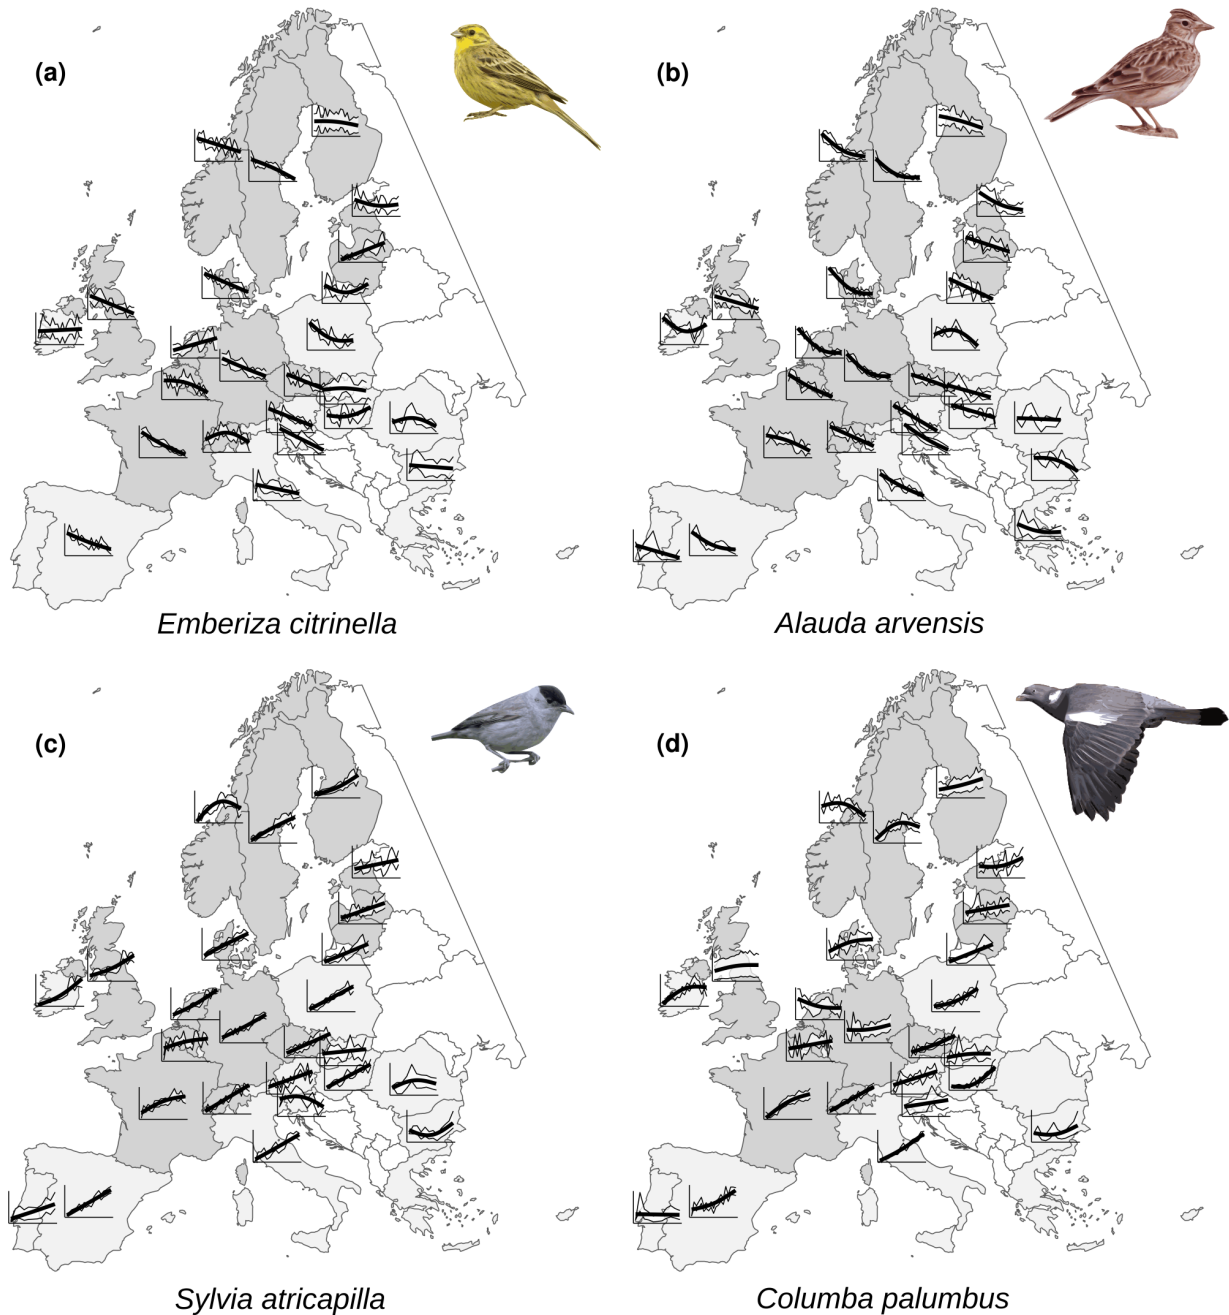

Figure S5: National trajectories of a) the yellowhammer *Emberiza citrinella*, b) the Eurasian skylark *Alauda arvensis*, c) the Eurasian blackcap *Sylvia atricapilla* and d) the common wood pigeon *Columba palumbus* among the European countries over the last decades. The main trajectory is shown by a black line and data with standard errors are shown in white. *E. citrinella* had mostly negative trends but in some countries (e.g. the Netherlands or Latvia) populations increased. On the contrary, *A. arvensis* only experienced negative trend among all countries. *S. atricapilla* and *C. palumbus* are

increasing in nearly all countries. Countries in grey are involved in the PanEuropean Common Bird Monitoring Scheme (PECBMS). Data are available from at least from 1996 to 2016 in 14 countries (medium grey) and after 1996 for others (light grey). Among the 124 species present in at least 2 countries, 17 species had a similar trend across countries (always negative) and 107 had different trends depending on the country.

Supplementary Information Appendix 5

| Species names                            | Selected for multispecies indices | Selected for species trends | for PECBMS habitat | Habitat generalist | Urban dweller | Cold vs. hot dwellers |
|------------------------------------------|-----------------------------------|-----------------------------|--------------------|--------------------|---------------|-----------------------|
| <b><i>Acanthis flammea</i></b>           | Yes                               | Yes                         | Other              |                    |               | Cold                  |
| <b><i>Accipiter nisus</i></b>            | Yes                               | Yes                         | Forest             | Yes                | Yes           |                       |
| <i>Acrocephalus arundinaceus</i>         |                                   | Yes                         | Other              |                    |               |                       |
| <b><i>Acrocephalus palustris</i></b>     | Yes                               | Yes                         | Other              |                    |               |                       |
| <b><i>Acrocephalus schoenobaenus</i></b> | Yes                               | Yes                         | Other              |                    |               |                       |
| <b><i>Acrocephalus scirpaceus</i></b>    | Yes                               | Yes                         | Other              |                    |               | Hot                   |
| <b><i>Actitis hypoleucos</i></b>         | Yes                               | Yes                         | Other              |                    |               | Cold                  |
| <b><i>Aegithalos caudatus</i></b>        | Yes                               | Yes                         | Other              |                    |               | Hot                   |
| <b><i>Alauda arvensis</i></b>            | Yes                               | Yes                         | Farmland           |                    |               |                       |
| <b><i>Alcedo atthis</i></b>              | Yes                               | Yes                         | Other              |                    |               | Hot                   |
| <i>Alectoris rufa</i>                    |                                   |                             | Farmland           |                    |               |                       |
| <b><i>Anas platyrhynchos</i></b>         | Yes                               | Yes                         | Other              |                    |               |                       |
| <i>Anthus campestris</i>                 |                                   | Yes                         | Farmland           |                    |               |                       |
| <b><i>Anthus pratensis</i></b>           | Yes                               | Yes                         | Farmland           |                    |               | Cold                  |
| <b><i>Anthus trivialis</i></b>           | Yes                               | Yes                         | Forest             | Yes                |               | Cold                  |
| <b><i>Apus apus</i></b>                  | Yes                               | Yes                         | Other              |                    | Yes           |                       |
| <b><i>Ardea cinerea</i></b>              | Yes                               | Yes                         | Other              | Yes                |               | Hot                   |
| <i>Bombycilla garrulus</i>               |                                   | Yes                         | Forest             |                    |               |                       |
| <b><i>Bonasa bonasia</i></b>             | Yes                               | Yes                         | Forest             |                    |               | Cold                  |
| <i>Bubulcus ibis</i>                     |                                   |                             | Farmland           |                    |               |                       |
| <i>Burhinus oedicephalus</i>             |                                   |                             | Farmland           |                    |               |                       |
| <b><i>Buteo buteo</i></b>                | Yes                               | Yes                         | Other              |                    |               | Hot                   |
| <i>Calandrella brachydactyla</i>         |                                   |                             | Farmland           |                    |               |                       |
| <b><i>Calcarius lapponicus</i></b>       | Yes                               | Yes                         | Other              |                    |               | Cold                  |
| <b><i>Carduelis carduelis</i></b>        | Yes                               | Yes                         | Other              |                    |               | Hot                   |
| <i>Carduelis citrinella</i>              |                                   |                             | Forest             |                    |               |                       |
| <b><i>Carpodacus erythrinus</i></b>      | Yes                               | Yes                         | Other              | Yes                |               | Cold                  |
| <i>Cecropis daurica</i>                  |                                   |                             | Other              |                    |               |                       |
| <i>Certhia brachydactyla</i>             |                                   | Yes                         | Forest             |                    |               |                       |
| <b><i>Certhia familiaris</i></b>         | Yes                               | Yes                         | Forest             |                    |               | Cold                  |
| <i>Cettia cetti</i>                      |                                   | Yes                         | Other              |                    |               |                       |
| <b><i>Chloris chloris</i></b>            | Yes                               | Yes                         | Other              |                    |               | Hot                   |
| <b><i>Ciconia ciconia</i></b>            | Yes                               | Yes                         | Farmland           |                    | Yes           | Hot                   |
| <b><i>Circus aeruginosus</i></b>         | Yes                               | Yes                         | Other              | Yes                |               | Hot                   |
| <i>Cisticola juncidis</i>                |                                   |                             | Other              |                    |               |                       |

|                                 |     |     |          |     |     |      |
|---------------------------------|-----|-----|----------|-----|-----|------|
| <i>Clamator glandarius</i>      |     |     | Other    |     |     |      |
| <b>Coccothraustes</b>           |     |     |          |     |     |      |
| <b>coccothraustes</b>           | Yes | Yes | Forest   |     |     | Hot  |
| <b>Columba oenas</b>            | Yes | Yes | Forest   | Yes |     |      |
| <b>Columba palumbus</b>         | Yes | Yes | Other    | Yes | Yes |      |
| <b>Corvus corax</b>             | Yes | Yes | Other    |     |     |      |
| <b>Corvus corone</b>            | Yes | Yes | Other    |     | Yes |      |
| <b>Corvus frugilegus</b>        | Yes | Yes | Farmland |     | Yes | Hot  |
| <b>Corvus monedula</b>          | Yes | Yes | Other    |     | Yes | Hot  |
| <b>Cuculus canorus</b>          | Yes | Yes | Other    | Yes |     |      |
| <b>Cyanistes caeruleus</b>      | Yes | Yes | Other    |     |     | Hot  |
| <i>Cyanopica cyanus</i>         |     |     | Forest   |     |     |      |
| <b>Cygnus olor</b>              | Yes | Yes | Other    |     |     |      |
| <b>Delichon urbicum</b>         | Yes | Yes | Other    |     | Yes |      |
| <b>Dendrocopos major</b>        | Yes | Yes | Other    |     | Yes |      |
| <i>Dendrocopos syriacus</i>     |     |     | Other    |     | Yes |      |
| <i>Dendrocoptes medius</i>      |     | Yes | Forest   |     |     |      |
| <b>Dryobates minor</b>          | Yes | Yes | Forest   |     |     |      |
| <b>Dryocopus martius</b>        | Yes | Yes | Forest   |     |     | Cold |
| <i>Egretta garzetta</i>         |     |     | Other    |     |     |      |
| <b>Emberiza calandra</b>        | Yes | Yes | Farmland |     |     | Hot  |
| <i>Emberiza cia</i>             |     |     | Other    |     |     |      |
| <i>Emberiza cirrus</i>          |     | Yes | Farmland |     |     |      |
| <b>Emberiza citrinella</b>      | Yes | Yes | Farmland |     |     |      |
| <b>Emberiza hortulana</b>       | Yes | Yes | Farmland | Yes |     | Hot  |
| <i>Emberiza melanocephala</i>   |     |     | Farmland |     |     |      |
| <b>Emberiza rustica</b>         | Yes | Yes | Forest   |     |     | Cold |
| <b>Emberiza schoeniclus</b>     | Yes | Yes | Other    |     |     | Cold |
| <b>Erithacus rubecula</b>       | Yes | Yes | Other    | Yes | Yes |      |
| <b>Falco tinnunculus</b>        | Yes | Yes | Farmland | Yes |     |      |
| <i>Ficedula albicollis</i>      |     | Yes | Forest   |     | Yes |      |
| <b>Ficedula hypoleuca</b>       | Yes | Yes | Forest   |     | Yes | Cold |
| <b>Fringilla coelebs</b>        | Yes | Yes | Other    |     |     |      |
| <b>Fringilla montifringilla</b> | Yes | Yes | Other    |     |     | Cold |
| <b>Fulica atra</b>              | Yes | Yes | Other    |     |     | Hot  |
| <i>Galerida cristata</i>        |     | Yes | Farmland |     | Yes |      |
| <i>Galerida theklae</i>         |     |     | Farmland |     |     |      |
| <b>Gallinago gallinago</b>      | Yes | Yes | Other    |     |     | Cold |
| <b>Gallinula chloropus</b>      | Yes | Yes | Other    |     |     | Hot  |
| <b>Garrulus glandarius</b>      | Yes | Yes | Forest   |     |     | Hot  |

|                                |     |     |          |     |     |      |
|--------------------------------|-----|-----|----------|-----|-----|------|
| <b>Grus grus</b>               | Yes | Yes | Other    |     |     | Cold |
| <b>Haematopus ostralegus</b>   | Yes | Yes | Other    | Yes |     | Cold |
| <b>Hippolais icterina</b>      | Yes | Yes | Other    |     |     |      |
| <i>Hippolais polyglotta</i>    |     | Yes | Other    |     |     |      |
| <b>Hirundo rustica</b>         | Yes | Yes | Farmland |     | Yes |      |
| <i>Iduna pallida</i>           |     |     | Other    |     |     |      |
| <b>Jynx torquilla</b>          | Yes | Yes | Other    |     |     |      |
| <b>Lanius collurio</b>         | Yes | Yes | Farmland |     |     | Hot  |
| <i>Lanius minor</i>            |     |     | Farmland |     |     |      |
| <i>Lanius senator</i>          |     |     | Farmland |     |     |      |
| <b>Larus ridibundus</b>        | Yes | Yes | Other    | Yes |     | Cold |
| <i>Limosa limosa</i>           |     | Yes | Farmland |     |     |      |
| <b>Linaria cannabina</b>       | Yes | Yes | Farmland |     |     | Hot  |
| <i>Locustella fluviatilis</i>  |     | Yes | Other    |     |     |      |
| <b>Locustella naevia</b>       | Yes | Yes | Other    |     |     |      |
| <b>Lophophanes cristatus</b>   | Yes | Yes | Forest   |     |     |      |
| <b>Lullula arborea</b>         | Yes | Yes | Other    | Yes |     | Hot  |
| <b>Luscinia luscinia</b>       | Yes | Yes | Other    |     |     |      |
| <b>Luscinia megarhynchos</b>   | Yes | Yes | Other    | Yes |     | Hot  |
| <b>Luscinia svecica</b>        | Yes | Yes | Other    |     |     | Cold |
| <b>Lyrurus tetrix</b>          | Yes | Yes | Other    |     |     | Cold |
| <i>Melanocorypha calandra</i>  |     |     | Farmland |     |     |      |
| <i>Merops apiaster</i>         |     | Yes | Other    |     |     |      |
| <b>Motacilla alba</b>          | Yes | Yes | Other    | Yes | Yes |      |
| <b>Motacilla cinerea</b>       | Yes | Yes | Other    |     |     | Hot  |
| <b>Motacilla flava</b>         | Yes | Yes | Farmland |     |     |      |
| <b>Muscicapa striata</b>       | Yes | Yes | Other    | Yes | Yes |      |
| <b>Nucifraga caryocatactes</b> | Yes | Yes | Forest   |     |     | Cold |
| <b>Numenius arquata</b>        | Yes | Yes | Other    |     |     | Cold |
| <i>Numenius phaeopus</i>       |     | Yes | Other    |     |     |      |
| <i>Oenanthe cyprica</i>        |     |     | NA       |     |     |      |
| <i>Oenanthe hispanica</i>      |     |     | Farmland |     |     |      |
| <b>Oenanthe oenanthe</b>       | Yes | Yes | Other    | Yes |     |      |
| <i>Oriolus oriolus</i>         |     | Yes | Other    |     |     |      |
| <b>Parus major</b>             | Yes | Yes | Other    | Yes | Yes |      |
| <b>Passer domesticus</b>       | Yes | Yes | Other    | Yes | Yes |      |
| <b>Passer montanus</b>         | Yes | Yes | Farmland |     | Yes | Hot  |
| <b>Perdix perdix</b>           | Yes | Yes | Farmland |     |     | Hot  |
| <b>Periparus ater</b>          | Yes | Yes | Forest   |     |     |      |
| <i>Petronia petronia</i>       |     |     | Farmland |     |     |      |

|                                       |     |     |          |     |     |      |
|---------------------------------------|-----|-----|----------|-----|-----|------|
| <b><i>Phasianus colchicus</i></b>     | Yes | Yes | Other    |     |     | Hot  |
| <i>Phoenicurus ochruros</i>           |     | Yes | Other    |     | Yes |      |
| <b><i>Phoenicurus phoenicurus</i></b> | Yes | Yes | Forest   | Yes |     |      |
| <i>Phylloscopus bonelli</i>           |     | Yes | Forest   |     |     |      |
| <b><i>Phylloscopus collybita</i></b>  | Yes | Yes | Forest   |     |     |      |
| <b><i>Phylloscopus sibilatrix</i></b> | Yes | Yes | Forest   |     |     |      |
| <b><i>Phylloscopus trochilus</i></b>  | Yes | Yes | Other    |     |     | Cold |
| <b><i>Pica pica</i></b>               | Yes | Yes | Other    | Yes | Yes |      |
| <i>Picus canus</i>                    |     | Yes | Forest   |     |     |      |
| <b><i>Picus viridis</i></b>           | Yes | Yes | Other    | Yes |     | Hot  |
| <b><i>Pluvialis apricaria</i></b>     | Yes | Yes | Other    |     |     | Cold |
| <b><i>Podiceps cristatus</i></b>      | Yes | Yes | Other    |     |     | Hot  |
| <b><i>Poecile montanus</i></b>        | Yes | Yes | Forest   |     |     | Cold |
| <b><i>Poecile palustris</i></b>       | Yes | Yes | Forest   |     |     |      |
| <b><i>Prunella modularis</i></b>      | Yes | Yes | Other    | Yes | Yes | Cold |
| <i>Ptyonoprogne rupestris</i>         |     |     | Other    |     |     |      |
| <i>Pyrrhocorax pyrrhocorax</i>        |     |     | Other    |     |     |      |
| <b><i>Pyrrhula pyrrhula</i></b>       | Yes | Yes | Forest   |     |     | Cold |
| <i>Regulus ignicapilla</i>            |     | Yes | Forest   |     |     |      |
| <b><i>Regulus regulus</i></b>         | Yes | Yes | Forest   |     |     | Cold |
| <b><i>Saxicola rubetra</i></b>        | Yes | Yes | Farmland |     |     | Cold |
| <i>Saxicola torquatus</i>             |     | Yes | Farmland |     |     |      |
| <i>Serinus serinus</i>                |     | Yes | Farmland |     | Yes |      |
| <b><i>Sitta europaea</i></b>          | Yes | Yes | Forest   |     |     | Hot  |
| <b><i>Spinus spinus</i></b>           | Yes | Yes | Forest   |     |     | Cold |
| <b><i>Streptopelia decaocto</i></b>   | Yes | Yes | Other    |     | Yes | Hot  |
| <b><i>Streptopelia turtur</i></b>     | Yes | Yes | Farmland | Yes |     | Hot  |
| <i>Sturnus unicolor</i>               |     |     | Farmland |     | Yes |      |
| <b><i>Sturnus vulgaris</i></b>        | Yes | Yes | Farmland |     | Yes |      |
| <b><i>Sylvia atricapilla</i></b>      | Yes | Yes | Other    | Yes |     | Hot  |
| <b><i>Sylvia borin</i></b>            | Yes | Yes | Other    |     |     |      |
| <i>Sylvia cantillans</i>              |     | Yes | Other    |     |     |      |
| <b><i>Sylvia communis</i></b>         | Yes | Yes | Farmland |     |     | Hot  |
| <b><i>Sylvia curruca</i></b>          | Yes | Yes | Other    | Yes |     |      |
| <i>Sylvia hortensis</i>               |     | Yes | Other    |     |     |      |
| <i>Sylvia melanocephala</i>           |     | Yes | Other    |     |     |      |
| <i>Sylvia melanothorax</i>            |     |     | NA       |     |     |      |
| <i>Sylvia nisoria</i>                 |     | Yes | Other    |     |     |      |
| <i>Sylvia undata</i>                  |     |     | Other    |     |     |      |
| <b><i>Tachybaptus ruficollis</i></b>  | Yes | Yes | Other    |     |     | Hot  |



|                                       |     |     |          |     |     |      |
|---------------------------------------|-----|-----|----------|-----|-----|------|
| <b><i>Tadorna tadorna</i></b>         | Yes | Yes | Other    |     |     |      |
| <i>Tetrax tetrax</i>                  |     |     | Farmland |     |     |      |
| <i>Tringa erythropus</i>              |     |     | Other    |     |     |      |
| <b><i>Tringa glareola</i></b>         | Yes | Yes | Other    |     |     | Cold |
| <b><i>Tringa nebularia</i></b>        | Yes | Yes | Other    |     |     | Cold |
| <b><i>Tringa ochropus</i></b>         | Yes | Yes | Forest   |     |     | Cold |
| <b><i>Tringa totanus</i></b>          | Yes | Yes | Other    |     |     | Cold |
| <b><i>Troglodytes troglodytes</i></b> | Yes | Yes | Other    | Yes |     |      |
| <b><i>Turdus iliacus</i></b>          | Yes | Yes | Other    |     |     | Cold |
| <b><i>Turdus merula</i></b>           | Yes | Yes | Other    | Yes | Yes |      |
| <b><i>Turdus philomelos</i></b>       | Yes | Yes | Other    | Yes |     | Hot  |
| <b><i>Turdus pilaris</i></b>          | Yes | Yes | Other    |     |     | Cold |
| <i>Turdus torquatus</i>               |     |     | Other    |     |     |      |
| <b><i>Turdus viscivorus</i></b>       | Yes | Yes | Forest   |     |     |      |
| <i>Upupa epops</i>                    |     | Yes | Farmland |     |     |      |
| <b><i>Vanellus vanellus</i></b>       | Yes | Yes | Farmland |     |     |      |

Table S4: List of the 170 European common bird species. Species habitat classification is shown according to the PanEuropean Common Bird Monitoring Scheme (PECBMS) classification. Generalist species are those with the lowest habitat specialisation index (SSI). Urban dwellers are species with a positive synanthropic index. Hot dwellers are the species with the highest STI (30%) and cold dwellers with the lowest STI (30%). Bolded species are the 115 species used for supranational multispecies indices, i.e. species monitored for the first time before 1981.

| Country        | Number of species |
|----------------|-------------------|
| Austria        | 90                |
| Belgium        | 81                |
| Bulgaria       | 56                |
| Cyprus         | 27                |
| Czech Republic | 108               |
| Denmark        | 88                |
| Estonia        | 80                |
| Finland        | 86                |
| France         | 129               |
| Germany        | 111               |
| Greece         | 45                |
| Hungary        | 90                |
| Ireland        | 54                |
| Italy          | 114               |
| Latvia         | 84                |
| Lithuania      | 61                |
| Luxembourg     | 40                |
| Netherlands    | 102               |
| Norway         | 72                |
| Poland         | 111               |
| Portugal       | 84                |
| Romania        | 31                |
| Slovakia       | 90                |
| Slovenia       | 62                |
| Spain          | 113               |
| Sweden         | 113               |
| Switzerland    | 103               |
| United Kingdom | 89                |

Table S5: Number of species among the 170 that are monitored in each country.

| Species names              | Austria | Belgium | Bulgaria | Cyprus | Czech Republic | Denmark | Estonia | Finland | France | Germany | Greece | Hungary | Italy | Ireland | Latvia | Lithuania | Luxembourg | Netherlands | Norway | Poland | Portugal | Romania | Slovakia | Slovenia | Spain | Sweden | Switzerland | UK  |     |
|----------------------------|---------|---------|----------|--------|----------------|---------|---------|---------|--------|---------|--------|---------|-------|---------|--------|-----------|------------|-------------|--------|--------|----------|---------|----------|----------|-------|--------|-------------|-----|-----|
| <i>Alauda arvensis</i>     | Yes     | Yes     | Yes      |        | Yes            | Yes     | Yes     | Yes     | Yes    | Yes     | Yes    | Yes     | Yes   | Yes     | Yes    | Yes       | Yes        | Yes         | Yes    | Yes    | Yes      | Yes     | Yes      | Yes      | Yes   | Yes    | Yes         | Yes |     |
| <i>Anthus pratensis</i>    | Yes     | Yes     |          |        | Yes            | Yes     | Yes     | Yes     | Yes    | Yes     |        |         |       |         |        |           |            |             |        |        |          |         |          |          |       |        |             |     |     |
| <i>Ciconia ciconia</i>     |         |         | Yes      |        | Yes            |         |         |         | Yes    | Yes     | Yes    |         |       |         |        |           |            |             |        |        | Yes      |         |          |          | Yes   |        | Yes         |     |     |
| <i>Corvus frugilegus</i>   |         | Yes     |          |        | Yes            | Yes     |         |         | Yes    | Yes     |        |         |       | Yes     |        |           |            |             |        |        |          |         |          |          |       | Yes    | Yes         |     |     |
| <i>Emberiza calandra</i>   | Yes     | Yes     | Yes      | Yes    | Yes            | Yes     |         |         | Yes    | Yes     | Yes    | Yes     | Yes   |         |        |           |            |             |        |        | Yes      | Yes     | Yes      | Yes      | Yes   | Yes    | Yes         | Yes |     |
| <i>Emberiza citrinella</i> | Yes     | Yes     | Yes      |        | Yes            | Yes     | Yes     | Yes     | Yes    | Yes     | Yes    | Yes     | Yes   | Yes     | Yes    |           | Yes        |             | Yes    |        |          | Yes     | Yes      | Yes      | Yes   | Yes    | Yes         | Yes |     |
| <i>Emberiza hortulana</i>  |         |         | Yes      |        |                |         |         | Yes     | Yes    | Yes     |        |         |       |         |        |           |            |             |        |        |          |         |          |          |       | Yes    | Yes         |     |     |
| <i>Falco tinnunculus</i>   | Yes     | Yes     | Yes      | Yes    | Yes            | Yes     |         |         | Yes    | Yes     | Yes    | Yes     | Yes   | Yes     |        |           |            |             | Yes    |        | Yes      |         | Yes      | Yes      | Yes   | Yes    | Yes         | Yes |     |
| <i>Hirundo rustica</i>     | Yes     | Yes     | Yes      | Yes    | Yes            | Yes     | Yes     | Yes     | Yes    | Yes     | Yes    | Yes     | Yes   | Yes     | Yes    | Yes       | Yes        | Yes         | Yes    | Yes    | Yes      | Yes     | Yes      | Yes      | Yes   | Yes    | Yes         | Yes | Yes |
| <i>Lanius collurio</i>     | Yes     | Yes     | Yes      |        | Yes            | Yes     | Yes     | Yes     | Yes    | Yes     | Yes    | Yes     | Yes   |         |        |           |            |             |        |        |          | Yes     |          |          |       | Yes    | Yes         | Yes |     |
| <i>Linaria cannabina</i>   | Yes     | Yes     |          | Yes    | Yes            | Yes     | Yes     | Yes     | Yes    | Yes     | Yes    | Yes     | Yes   | Yes     | Yes    | Yes       | Yes        | Yes         | Yes    | Yes    | Yes      | Yes     | Yes      | Yes      | Yes   | Yes    | Yes         | Yes |     |
| <i>Motacilla flava</i>     | Yes     | Yes     | Yes      |        | Yes            | Yes     | Yes     | Yes     | Yes    | Yes     | Yes    | Yes     | Yes   | Yes     | Yes    | Yes       |            |             | Yes    |        |          | Yes     | Yes      | Yes      | Yes   | Yes    | Yes         | Yes |     |
| <i>Passer montanus</i>     | Yes     | Yes     | Yes      |        | Yes            | Yes     | Yes     | Yes     | Yes    | Yes     | Yes    | Yes     | Yes   | Yes     | Yes    | Yes       | Yes        | Yes         | Yes    | Yes    | Yes      | Yes     | Yes      | Yes      | Yes   | Yes    | Yes         | Yes |     |
| <i>Perdix perdix</i>       | Yes     | Yes     |          |        | Yes            | Yes     |         |         | Yes    | Yes     | Yes    | Yes     | Yes   |         |        |           |            |             |        |        |          |         |          |          |       | Yes    | Yes         |     |     |
| <i>Saxicola rubetra</i>    | Yes     |         |          |        | Yes            | Yes     | Yes     | Yes     | Yes    | Yes     | Yes    | Yes     | Yes   | Yes     | Yes    | Yes       |            |             | Yes    | Yes    | Yes      | Yes     | Yes      | Yes      | Yes   | Yes    | Yes         | Yes |     |
| <i>Streptopelia turtur</i> | Yes     | Yes     | Yes      | Yes    | Yes            | Yes     | Yes     | Yes     | Yes    | Yes     | Yes    | Yes     | Yes   | Yes     | Yes    | Yes       | Yes        | Yes         | Yes    | Yes    | Yes      | Yes     | Yes      | Yes      | Yes   | Yes    | Yes         | Yes |     |
| <i>Sturnus vulgaris</i>    | Yes     | Yes     | Yes      |        | Yes            | Yes     | Yes     | Yes     | Yes    | Yes     | Yes    | Yes     | Yes   | Yes     | Yes    | Yes       | Yes        | Yes         | Yes    | Yes    | Yes      | Yes     | Yes      | Yes      | Yes   | Yes    | Yes         | Yes |     |
| <i>Sylvia communis</i>     | Yes     | Yes     | Yes      |        | Yes            | Yes     | Yes     | Yes     | Yes    | Yes     | Yes    | Yes     | Yes   | Yes     | Yes    | Yes       |            |             | Yes    | Yes    | Yes      | Yes     | Yes      | Yes      | Yes   | Yes    | Yes         | Yes |     |
| <i>Vanellus vanellus</i>   | Yes     | Yes     |          |        | Yes            | Yes     | Yes     | Yes     | Yes    | Yes     |        | Yes     | Yes   |         |        |           |            | Yes         | Yes    | Yes    |          |         | Yes      | Yes      |       | Yes    |             | Yes |     |

Table S6: 19 species selected for the computation of the farmland multispecies index for each county.

| Species names              | Austria | Belgium | Bulgaria | Cyprus | Czech Republic | Denmark | Estonia | Finland | France | Germany | Greece | Hungary | Italy | Ireland | Latvia | Lithuania | Luxembourg | Netherlands | Norway | Poland | Portugal | Romania | Slovakia | Slovenia | Spain | Sweden | Switzerland | UK  |
|----------------------------|---------|---------|----------|--------|----------------|---------|---------|---------|--------|---------|--------|---------|-------|---------|--------|-----------|------------|-------------|--------|--------|----------|---------|----------|----------|-------|--------|-------------|-----|
| <i>Accipiter nisus</i>     |         | Yes     |          |        | Yes            | Yes     |         |         | Yes    | Yes     |        | Yes     | Yes   | Yes     |        |           |            | Yes         |        | Yes    |          |         |          | Yes      | Yes   | Yes    | Yes         |     |
| <i>Anthus trivialis</i>    | Yes     | Yes     |          |        | Yes            | Yes     | Yes     | Yes     | Yes    | Yes     |        | Yes     | Yes   |         |        |           |            |             | Yes    |        |          | Yes     | Yes      | Yes      | Yes   | Yes    | Yes         |     |
| <i>Bonasa bonasia</i>      |         |         |          |        |                |         | Yes     | Yes     |        |         |        |         | Yes   |         |        |           |            |             |        |        |          |         |          |          | Yes   | Yes    | Yes         |     |
| <i>Certhia familiaris</i>  | Yes     | Yes     |          |        | Yes            | Yes     | Yes     | Yes     | Yes    | Yes     |        |         | Yes   | Yes     |        |           |            |             |        |        |          |         |          |          | Yes   | Yes    | Yes         |     |
| <i>Coccothraustes</i>      |         |         |          |        |                |         |         |         |        |         |        |         |       |         |        |           |            |             |        |        |          |         |          |          |       |        |             |     |
| <i>coccothraustes</i>      | Yes     | Yes     | Yes      |        | Yes            | Yes     | Yes     |         | Yes    | Yes     |        | Yes     | Yes   |         |        |           |            |             |        | Yes    | Yes      |         | Yes      | Yes      | Yes   | Yes    | Yes         |     |
| <i>Columba oenas</i>       | Yes     | Yes     |          |        | Yes            | Yes     | Yes     | Yes     | Yes    | Yes     |        | Yes     | Yes   | Yes     |        |           | Yes        | Yes         |        | Yes    | Yes      |         | Yes      | Yes      | Yes   | Yes    | Yes         |     |
| <i>Dryobates minor</i>     | Yes     | Yes     |          |        | Yes            | Yes     | Yes     | Yes     | Yes    | Yes     |        | Yes     | Yes   |         |        |           |            |             |        | Yes    | Yes      |         | Yes      | Yes      | Yes   | Yes    | Yes         |     |
| <i>Dryocopus martius</i>   | Yes     | Yes     |          |        | Yes            | Yes     | Yes     | Yes     | Yes    | Yes     |        | Yes     | Yes   |         |        |           |            |             | Yes    | Yes    |          |         | Yes      | Yes      | Yes   | Yes    | Yes         |     |
| <i>Emberiza rustica</i>    |         |         |          |        |                |         |         |         |        |         |        |         |       |         |        |           |            |             |        |        |          |         |          |          |       |        |             |     |
| <i>Ficedula hypoleuca</i>  |         |         |          |        | Yes            | Yes     | Yes     | Yes     | Yes    | Yes     |        |         |       | Yes     | Yes    |           |            | Yes         | Yes    | Yes    |          |         |          |          | Yes   | Yes    | Yes         |     |
| <i>Garrulus glandarius</i> | Yes     | Yes     | Yes      |        | Yes            | Yes     | Yes     | Yes     | Yes    | Yes     | Yes    | Yes     | Yes   | Yes     | Yes    | Yes       | Yes        | Yes         | Yes    | Yes    | Yes      | Yes     | Yes      | Yes      | Yes   | Yes    | Yes         | Yes |
| <i>Lophophanes</i>         |         |         |          |        |                |         |         |         |        |         |        |         |       |         |        |           |            |             |        |        |          |         |          |          |       |        |             |     |
| <i>cristatus</i>           | Yes     | Yes     |          |        | Yes            | Yes     | Yes     | Yes     | Yes    | Yes     |        |         | Yes   |         |        |           |            | Yes         | Yes    | Yes    | Yes      |         | Yes      | Yes      | Yes   | Yes    | Yes         |     |
| <i>Nucifraga</i>           |         |         |          |        |                |         |         |         |        |         |        |         |       |         |        |           |            |             |        |        |          |         |          |          |       |        |             |     |
| <i>caryocatactes</i>       |         |         |          |        | Yes            | Yes     | Yes     | Yes     | Yes    | Yes     |        | Yes     | Yes   | Yes     |        |           |            |             |        |        |          |         |          |          |       | Yes    | Yes         |     |
| <i>Periparus ater</i>      | Yes     | Yes     |          | Yes    | Yes            | Yes     | Yes     | Yes     | Yes    | Yes     |        | Yes     | Yes   | Yes     |        |           | Yes        | Yes         | Yes    | Yes    | Yes      |         | Yes      | Yes      | Yes   | Yes    | Yes         |     |
| <i>Phoenicurus</i>         |         |         |          |        |                |         |         |         |        |         |        |         |       |         |        |           |            |             |        |        |          |         |          |          |       |        |             |     |
| <i>phoenicurus</i>         | Yes     | Yes     |          |        | Yes            | Yes     | Yes     | Yes     | Yes    | Yes     |        |         | Yes   |         |        |           |            | Yes         | Yes    | Yes    | Yes      |         | Yes      | Yes      | Yes   | Yes    | Yes         |     |
| <i>Phylloscopus</i>        |         |         |          |        |                |         |         |         |        |         |        |         |       |         |        |           |            |             |        |        |          |         |          |          |       |        |             |     |
| <i>collybita</i>           | Yes     | Yes     | Yes      |        | Yes            | Yes     | Yes     | Yes     | Yes    | Yes     |        | Yes     | Yes   | Yes     | Yes    | Yes       | Yes        | Yes         | Yes    | Yes    | Yes      | Yes     | Yes      | Yes      | Yes   | Yes    | Yes         |     |
| <i>Phylloscopus</i>        |         |         |          |        |                |         |         |         |        |         |        |         |       |         |        |           |            |             |        |        |          |         |          |          |       |        |             |     |
| <i>sibilatrix</i>          | Yes     | Yes     |          |        | Yes            | Yes     | Yes     | Yes     | Yes    | Yes     |        | Yes     | Yes   |         | Yes    |           |            |             |        |        |          |         |          |          |       | Yes    | Yes         |     |
| <i>Poecile montanus</i>    | Yes     | Yes     |          |        | Yes            | Yes     | Yes     | Yes     | Yes    | Yes     |        | Yes     | Yes   | Yes     |        |           |            | Yes         | Yes    | Yes    | Yes      |         | Yes      | Yes      | Yes   | Yes    | Yes         |     |
| <i>Poecile palustris</i>   | Yes     | Yes     |          |        | Yes            | Yes     | Yes     | Yes     | Yes    | Yes     |        | Yes     | Yes   |         |        |           | Yes        | Yes         | Yes    | Yes    | Yes      |         | Yes      | Yes      | Yes   | Yes    | Yes         |     |
| <i>Pyrhula pyrthula</i>    | Yes     | Yes     |          |        | Yes            | Yes     | Yes     | Yes     | Yes    | Yes     |        | Yes     | Yes   | Yes     |        |           |            | Yes         | Yes    | Yes    | Yes      |         | Yes      | Yes      | Yes   | Yes    | Yes         |     |
| <i>Regulus regulus</i>     | Yes     | Yes     |          |        | Yes            | Yes     | Yes     | Yes     | Yes    | Yes     |        | Yes     | Yes   | Yes     |        |           | Yes        | Yes         | Yes    | Yes    | Yes      |         | Yes      | Yes      | Yes   | Yes    | Yes         |     |
| <i>Sitta europaea</i>      | Yes     | Yes     |          |        | Yes            | Yes     | Yes     | Yes     | Yes    | Yes     |        | Yes     | Yes   | Yes     | Yes    | Yes       | Yes        | Yes         | Yes    | Yes    | Yes      | Yes     | Yes      | Yes      | Yes   | Yes    | Yes         |     |
| <i>Spinus spinus</i>       | Yes     |         |          |        | Yes            | Yes     | Yes     | Yes     | Yes    | Yes     |        | Yes     | Yes   | Yes     | Yes    | Yes       | Yes        | Yes         | Yes    | Yes    | Yes      | Yes     | Yes      | Yes      | Yes   | Yes    | Yes         |     |
| <i>Tringa ochropus</i>     |         |         |          |        |                |         |         |         |        |         |        |         |       |         |        |           |            |             |        |        |          |         |          |          |       |        |             |     |
| <i>Turdus viscivorus</i>   | Yes     | Yes     |          |        | Yes            | Yes     | Yes     | Yes     | Yes    | Yes     |        | Yes     | Yes   | Yes     | Yes    | Yes       | Yes        | Yes         | Yes    | Yes    | Yes      | Yes     | Yes      | Yes      | Yes   | Yes    | Yes         |     |

Table S7: 25 species selected for the computation of the forest multispecies index for each county.

| Species names             | Austria | Belgium | Bulgaria | Cyprus | Czech Republic | Denmark | Estonia | Finland | France | Germany | Greece | Hungary | Italy | Ireland | Latvia | Lithuania | Luxembourg | Netherlands | Norway | Poland | Portugal | Romania | Slovakia | Slovenia | Spain | Sweden | Switzerland | UK  |
|---------------------------|---------|---------|----------|--------|----------------|---------|---------|---------|--------|---------|--------|---------|-------|---------|--------|-----------|------------|-------------|--------|--------|----------|---------|----------|----------|-------|--------|-------------|-----|
| <i>Accipiter nisus</i>    |         | Yes     |          |        | Yes            | Yes     |         |         | Yes    | Yes     |        | Yes     | Yes   | Yes     |        |           |            | Yes         |        | Yes    |          |         |          |          | Yes   | Yes    | Yes         | Yes |
| <i>Apus apus</i>          | Yes     | Yes     | Yes      | Yes    | Yes            | Yes     | Yes     | Yes     | Yes    | Yes     | Yes    | Yes     | Yes   | Yes     |        |           |            |             | Yes    |        | Yes      |         | Yes      |          | Yes   | Yes    | Yes         | Yes |
| <i>Ciconia ciconia</i>    |         |         | Yes      |        | Yes            |         |         |         | Yes    | Yes     | Yes    |         |       |         | Yes    | Yes       |            | Yes         |        | Yes    | Yes      |         | Yes      |          | Yes   |        | Yes         | Yes |
| <i>Columba palumbus</i>   | Yes     | Yes     | Yes      | Yes    | Yes            | Yes     | Yes     | Yes     | Yes    | Yes     |        | Yes     | Yes   | Yes     | Yes    | Yes       | Yes        | Yes         | Yes    | Yes    | Yes      |         | Yes      | Yes      | Yes   | Yes    | Yes         | Yes |
| <i>Corvus corone</i>      | Yes     | Yes     | Yes      | Yes    | Yes            | Yes     | Yes     | Yes     | Yes    | Yes     | Yes    | Yes     | Yes   | Yes     | Yes    | Yes       | Yes        | Yes         | Yes    | Yes    | Yes      |         | Yes      | Yes      | Yes   | Yes    | Yes         | Yes |
| <i>Corvus frugilegus</i>  |         | Yes     |          |        | Yes            | Yes     |         |         | Yes    | Yes     |        | Yes     |       | Yes     |        |           |            | Yes         |        | Yes    |          |         | Yes      |          | Yes   | Yes    | Yes         | Yes |
| <i>Coloeus monedula</i>   | Yes     | Yes     | Yes      | Yes    | Yes            | Yes     | Yes     | Yes     | Yes    | Yes     | Yes    | Yes     | Yes   | Yes     | Yes    | Yes       | Yes        | Yes         |        | Yes    |          |         | Yes      | Yes      | Yes   | Yes    | Yes         | Yes |
| <i>Delichon urbicum</i>   | Yes     | Yes     | Yes      | Yes    | Yes            | Yes     | Yes     | Yes     | Yes    | Yes     | Yes    | Yes     | Yes   | Yes     | Yes    | Yes       | Yes        | Yes         | Yes    | Yes    | Yes      |         | Yes      | Yes      | Yes   | Yes    | Yes         | Yes |
| <i>Dendrocopos major</i>  | Yes     | Yes     | Yes      |        | Yes            | Yes     | Yes     | Yes     | Yes    | Yes     |        | Yes     | Yes   |         | Yes    | Yes       | Yes        | Yes         | Yes    | Yes    | Yes      | Yes     | Yes      | Yes      | Yes   | Yes    | Yes         | Yes |
| <i>Erithacus rubecula</i> | Yes     | Yes     | Yes      |        | Yes            | Yes     | Yes     | Yes     | Yes    | Yes     |        | Yes     | Yes   | Yes     | Yes    | Yes       | Yes        | Yes         | Yes    | Yes    | Yes      | Yes     | Yes      | Yes      | Yes   | Yes    | Yes         | Yes |
| <i>Ficedula hypoleuca</i> |         |         |          |        | Yes            | Yes     | Yes     | Yes     | Yes    | Yes     |        |         |       |         | Yes    | Yes       |            | Yes         | Yes    | Yes    |          |         |          |          | Yes   | Yes    | Yes         | Yes |
| <i>Hirundo rustica</i>    | Yes     | Yes     | Yes      | Yes    | Yes            | Yes     | Yes     | Yes     | Yes    | Yes     | Yes    | Yes     | Yes   | Yes     | Yes    | Yes       | Yes        | Yes         | Yes    | Yes    | Yes      |         | Yes      | Yes      | Yes   | Yes    | Yes         | Yes |
| <i>Motacilla alba</i>     | Yes     | Yes     |          |        | Yes            | Yes     | Yes     | Yes     | Yes    | Yes     |        | Yes     | Yes   | Yes     | Yes    | Yes       | Yes        | Yes         | Yes    | Yes    | Yes      | Yes     | Yes      | Yes      | Yes   | Yes    | Yes         | Yes |
| <i>Muscicapa striata</i>  | Yes     | Yes     |          |        | Yes            | Yes     | Yes     | Yes     | Yes    | Yes     |        | Yes     | Yes   | Yes     | Yes    | Yes       | Yes        | Yes         | Yes    | Yes    | Yes      |         | Yes      | Yes      | Yes   | Yes    | Yes         | Yes |
| <i>Parus major</i>        | Yes     | Yes     | Yes      | Yes    | Yes            | Yes     | Yes     | Yes     | Yes    | Yes     | Yes    | Yes     | Yes   | Yes     | Yes    | Yes       | Yes        | Yes         | Yes    | Yes    | Yes      | Yes     | Yes      | Yes      | Yes   | Yes    | Yes         | Yes |
| <i>Passer domesticus</i>  | Yes     | Yes     | Yes      | Yes    | Yes            | Yes     | Yes     | Yes     | Yes    | Yes     | Yes    | Yes     | Yes   | Yes     | Yes    | Yes       | Yes        | Yes         | Yes    | Yes    | Yes      | Yes     | Yes      | Yes      | Yes   | Yes    | Yes         | Yes |
| <i>Passer montanus</i>    | Yes     | Yes     | Yes      |        | Yes            | Yes     | Yes     | Yes     | Yes    | Yes     | Yes    | Yes     | Yes   | Yes     | Yes    | Yes       | Yes        | Yes         | Yes    | Yes    | Yes      | Yes     | Yes      | Yes      | Yes   | Yes    | Yes         | Yes |
| <i>Pica pica</i>          | Yes     | Yes     | Yes      | Yes    | Yes            | Yes     | Yes     | Yes     | Yes    | Yes     | Yes    | Yes     | Yes   | Yes     | Yes    | Yes       | Yes        | Yes         | Yes    | Yes    | Yes      | Yes     | Yes      | Yes      | Yes   | Yes    | Yes         | Yes |
| <i>Prunella modularis</i> | Yes     | Yes     |          |        | Yes            | Yes     | Yes     | Yes     | Yes    | Yes     |        | Yes     | Yes   | Yes     | Yes    | Yes       | Yes        | Yes         | Yes    | Yes    | Yes      |         | Yes      | Yes      | Yes   | Yes    | Yes         | Yes |
| <i>Streptopelia</i>       |         |         |          |        |                |         |         |         |        |         |        |         |       |         |        |           |            |             |        |        |          |         |          |          |       |        |             |     |
| <i>decaocto</i>           | Yes     | Yes     | Yes      | Yes    | Yes            | Yes     | Yes     | Yes     | Yes    | Yes     | Yes    | Yes     | Yes   | Yes     | Yes    | Yes       | Yes        | Yes         | Yes    | Yes    | Yes      |         | Yes      | Yes      | Yes   | Yes    | Yes         | Yes |
| <i>Sturnus vulgaris</i>   | Yes     | Yes     | Yes      |        | Yes            | Yes     | Yes     | Yes     | Yes    | Yes     | Yes    | Yes     | Yes   | Yes     | Yes    | Yes       | Yes        | Yes         | Yes    | Yes    | Yes      | Yes     | Yes      | Yes      | Yes   | Yes    | Yes         | Yes |
| <i>Turdus merula</i>      | Yes     | Yes     | Yes      |        | Yes            | Yes     | Yes     | Yes     | Yes    | Yes     | Yes    | Yes     | Yes   | Yes     | Yes    | Yes       | Yes        | Yes         | Yes    | Yes    | Yes      | Yes     | Yes      | Yes      | Yes   | Yes    | Yes         | Yes |

Table S8: 22 species selected for the computation of the urban multispecies index for each county.

| Species names                 | Austria | Belgium | Bulgaria | Cyprus | Czech Republic | Denmark | Estonia | Finland | France | Germany | Greece | Hungary | Italy | Ireland | Latvia | Lithuania | Luxembourg | Netherlands | Norway | Poland | Portugal | Romania | Slovakia | Slovenia | Spain | Sweden | Switzerland | UK  |
|-------------------------------|---------|---------|----------|--------|----------------|---------|---------|---------|--------|---------|--------|---------|-------|---------|--------|-----------|------------|-------------|--------|--------|----------|---------|----------|----------|-------|--------|-------------|-----|
| <b>Acrocephalus</b>           |         |         |          |        |                |         |         |         |        |         |        |         |       |         |        |           |            |             |        |        |          |         |          |          |       |        |             |     |
| <i>scirpaceus</i>             |         |         |          |        | Yes            | Yes     |         | Yes     | Yes    |         |        | Yes     | Yes   |         |        |           |            | Yes         |        | Yes    | Yes      |         |          |          | Yes   | Yes    | Yes         | Yes |
| <i>Aegithalos caudatus</i>    | Yes     |         |          |        | Yes            | Yes     | Yes     | Yes     | Yes    |         |        | Yes     | Yes   | Yes     | Yes    |           |            |             |        | Yes    |          |         | Yes      |          |       | Yes    | Yes         | Yes |
| <i>Alcedo atthis</i>          |         |         |          |        | Yes            |         |         |         | Yes    |         |        | Yes     | Yes   |         |        |           |            |             |        | Yes    |          |         |          |          | Yes   | Yes    | Yes         | Yes |
| <i>Ardea cinerea</i>          | Yes     |         | Yes      |        |                | Yes     |         |         | Yes    |         |        | Yes     | Yes   | Yes     |        | Yes       |            |             | Yes    |        | Yes      |         |          |          | Yes   | Yes    | Yes         | Yes |
| <i>Buteo buteo</i>            | Yes     | Yes     |          |        | Yes            | Yes     | Yes     | Yes     | Yes    |         | Yes    | Yes     | Yes   | Yes     | Yes    | Yes       | Yes        |             |        | Yes    | Yes      | Yes     | Yes      |          | Yes   | Yes    | Yes         | Yes |
| <i>Carduelis carduelis</i>    | Yes     | Yes     | Yes      |        | Yes            | Yes     | Yes     | Yes     | Yes    |         | Yes    | Yes     | Yes   | Yes     | Yes    | Yes       |            |             |        | Yes    | Yes      | Yes     | Yes      |          | Yes   | Yes    | Yes         | Yes |
| <i>Chloris chloris</i>        | Yes     |         | Yes      |        | Yes            | Yes     | Yes     | Yes     | Yes    |         | Yes    | Yes     | Yes   | Yes     | Yes    | Yes       |            |             | Yes    | Yes    | Yes      | Yes     |          | Yes      | Yes   | Yes    | Yes         | Yes |
| <i>Ciconia ciconia</i>        |         |         | Yes      |        | Yes            |         |         |         | Yes    |         | Yes    | Yes     | Yes   | Yes     | Yes    | Yes       |            |             |        | Yes    | Yes      | Yes     | Yes      |          | Yes   | Yes    | Yes         | Yes |
| <i>Circus aeruginosus</i>     | Yes     |         |          |        | Yes            | Yes     |         |         | Yes    |         | Yes    | Yes     | Yes   | Yes     | Yes    | Yes       |            |             |        | Yes    | Yes      | Yes     | Yes      |          | Yes   | Yes    | Yes         | Yes |
| <i>Coccothraustes</i>         |         |         |          |        |                |         |         |         |        |         |        |         |       |         |        |           |            |             |        |        |          |         |          |          |       |        |             |     |
| <i>coccothraustes</i>         | Yes     |         | Yes      |        | Yes            | Yes     | Yes     | Yes     | Yes    |         |        | Yes     | Yes   | Yes     | Yes    | Yes       | Yes        |             |        | Yes    | Yes      |         | Yes      | Yes      | Yes   | Yes    | Yes         | Yes |
| <i>Corvus frugilegus</i>      |         |         |          |        | Yes            | Yes     | Yes     | Yes     | Yes    |         |        | Yes     | Yes   | Yes     | Yes    | Yes       | Yes        |             |        | Yes    | Yes      |         | Yes      | Yes      | Yes   | Yes    | Yes         | Yes |
| <i>Coloeus monedula</i>       | Yes     | Yes     | Yes      |        | Yes            | Yes     | Yes     | Yes     | Yes    |         | Yes    | Yes     | Yes   | Yes     | Yes    | Yes       | Yes        |             |        | Yes    | Yes      |         | Yes      | Yes      | Yes   | Yes    | Yes         | Yes |
| <i>Cyanistes caeruleus</i>    | Yes     | Yes     |          |        | Yes            | Yes     | Yes     | Yes     | Yes    |         | Yes    | Yes     | Yes   | Yes     | Yes    | Yes       |            |             | Yes    | Yes    | Yes      | Yes     |          | Yes      | Yes   | Yes    | Yes         | Yes |
| <i>Emberiza calandria</i>     | Yes     | Yes     | Yes      |        | Yes            | Yes     |         |         | Yes    |         | Yes    | Yes     | Yes   | Yes     | Yes    | Yes       |            |             |        | Yes    | Yes      | Yes     | Yes      | Yes      | Yes   | Yes    | Yes         | Yes |
| <i>Emberiza hortulana</i>     |         |         |          |        |                |         |         | Yes     | Yes    |         |        |         |       |         |        |           |            |             |        | Yes    | Yes      |         | Yes      | Yes      | Yes   | Yes    | Yes         | Yes |
| <i>Fulica atra</i>            | Yes     |         |          |        | Yes            | Yes     |         |         | Yes    |         |        | Yes     | Yes   |         |        |           |            |             |        | Yes    | Yes      |         | Yes      | Yes      | Yes   | Yes    | Yes         | Yes |
| <i>Gallinula chloropus</i>    |         |         |          |        | Yes            | Yes     |         |         | Yes    |         |        | Yes     | Yes   | Yes     |        |           |            |             |        | Yes    | Yes      |         | Yes      | Yes      | Yes   | Yes    | Yes         | Yes |
| <i>Garrulus glandarius</i>    | Yes     | Yes     | Yes      |        | Yes            | Yes     | Yes     | Yes     | Yes    |         | Yes    | Yes     | Yes   | Yes     | Yes    | Yes       | Yes        |             |        | Yes    | Yes      | Yes     | Yes      | Yes      | Yes   | Yes    | Yes         | Yes |
| <i>Lanius collurio</i>        | Yes     | Yes     |          |        | Yes            | Yes     | Yes     | Yes     | Yes    |         | Yes    | Yes     | Yes   | Yes     | Yes    | Yes       |            |             | Yes    | Yes    | Yes      | Yes     | Yes      | Yes      | Yes   | Yes    | Yes         | Yes |
| <i>Linaria cannabina</i>      | Yes     |         | Yes      |        | Yes            | Yes     | Yes     | Yes     | Yes    |         | Yes    | Yes     | Yes   | Yes     | Yes    | Yes       |            |             |        | Yes    | Yes      | Yes     | Yes      | Yes      | Yes   | Yes    | Yes         | Yes |
| <i>Lullula arborea</i>        | Yes     |         | Yes      |        | Yes            |         |         |         | Yes    |         | Yes    | Yes     | Yes   | Yes     | Yes    | Yes       |            |             |        | Yes    | Yes      |         | Yes      | Yes      | Yes   | Yes    | Yes         | Yes |
| <i>Luscinia</i>               |         |         |          |        |                |         |         |         |        |         |        |         |       |         |        |           |            |             |        |        |          |         |          |          |       |        |             |     |
| <i>megathynchos</i>           | Yes     |         | Yes      |        | Yes            |         |         |         | Yes    |         | Yes    | Yes     | Yes   |         |        |           | Yes        | Yes         |        | Yes    | Yes      | Yes     | Yes      | Yes      | Yes   | Yes    | Yes         | Yes |
| <i>Motacilla cinerea</i>      | Yes     |         |          |        | Yes            |         |         |         | Yes    |         | Yes    | Yes     | Yes   | Yes     |        |           |            |             |        | Yes    | Yes      |         | Yes      | Yes      | Yes   | Yes    | Yes         | Yes |
| <i>Passer montanus</i>        | Yes     | Yes     |          |        | Yes            | Yes     | Yes     | Yes     | Yes    |         | Yes    | Yes     | Yes   | Yes     | Yes    | Yes       |            |             |        | Yes    | Yes      | Yes     | Yes      | Yes      | Yes   | Yes    | Yes         | Yes |
| <i>Perdix perdix</i>          | Yes     |         |          |        | Yes            | Yes     |         |         | Yes    |         |        | Yes     | Yes   | Yes     |        |           |            |             |        | Yes    | Yes      |         | Yes      | Yes      | Yes   | Yes    | Yes         | Yes |
| <i>Phasianus colchicus</i>    | Yes     | Yes     |          |        | Yes            | Yes     |         | Yes     | Yes    |         | Yes    | Yes     | Yes   | Yes     |        |           |            |             |        | Yes    | Yes      | Yes     | Yes      | Yes      | Yes   | Yes    | Yes         | Yes |
| <i>Picus viridis</i>          | Yes     | Yes     |          |        | Yes            | Yes     |         |         | Yes    |         | Yes    | Yes     | Yes   | Yes     |        |           | Yes        | Yes         | Yes    | Yes    | Yes      | Yes     | Yes      | Yes      | Yes   | Yes    | Yes         | Yes |
| <i>Podiceps cristatus</i>     |         |         |          |        | Yes            | Yes     |         |         | Yes    |         |        | Yes     | Yes   | Yes     |        |           |            |             |        | Yes    | Yes      | Yes     | Yes      | Yes      | Yes   | Yes    | Yes         | Yes |
| <i>Sitta europaea</i>         | Yes     |         |          |        | Yes            | Yes     | Yes     | Yes     | Yes    |         |        | Yes     | Yes   | Yes     | Yes    | Yes       | Yes        | Yes         | Yes    | Yes    | Yes      | Yes     | Yes      | Yes      | Yes   | Yes    | Yes         | Yes |
| <i>Streptopelia</i>           |         |         |          |        |                |         |         |         |        |         |        |         |       |         |        |           |            |             |        |        |          |         |          |          |       |        |             |     |
| <i>decaocto</i>               | Yes     | Yes     | Yes      |        | Yes            | Yes     |         |         | Yes    |         | Yes    | Yes     | Yes   | Yes     |        |           |            |             |        | Yes    | Yes      | Yes     | Yes      | Yes      | Yes   | Yes    | Yes         | Yes |
| <i>Streptopelia turtur</i>    | Yes     | Yes     | Yes      |        | Yes            | Yes     | Yes     | Yes     | Yes    |         | Yes    | Yes     | Yes   | Yes     | Yes    | Yes       |            |             |        | Yes    | Yes      | Yes     | Yes      | Yes      | Yes   | Yes    | Yes         | Yes |
| <i>Sylvia atricapilla</i>     | Yes     | Yes     |          |        | Yes            | Yes     | Yes     | Yes     | Yes    |         | Yes    | Yes     | Yes   | Yes     | Yes    | Yes       |            |             |        | Yes    | Yes      | Yes     | Yes      | Yes      | Yes   | Yes    | Yes         | Yes |
| <i>Sylvia communis</i>        | Yes     | Yes     |          |        | Yes            | Yes     | Yes     | Yes     | Yes    |         | Yes    | Yes     | Yes   | Yes     | Yes    | Yes       |            |             |        | Yes    | Yes      | Yes     | Yes      | Yes      | Yes   | Yes    | Yes         | Yes |
| <i>Tachybaptus ruficollis</i> |         |         |          |        | Yes            | Yes     |         |         | Yes    |         |        | Yes     | Yes   |         |        |           |            |             |        | Yes    | Yes      |         | Yes      | Yes      | Yes   | Yes    | Yes         | Yes |
| <i>Turdus merula</i>          | Yes     |         | Yes      |        | Yes            | Yes     | Yes     | Yes     | Yes    |         | Yes    | Yes     | Yes   | Yes     | Yes    | Yes       | Yes        | Yes         | Yes    | Yes    | Yes      | Yes     | Yes      | Yes      | Yes   | Yes    | Yes         | Yes |

Table S9: 35 species selected for the computation of the hot-dweller multispecies index for each county.

| Species names                   | Austria | Belgium | Bulgaria | Cyprus | Czech Republic | Denmark | Estonia | Finland | France | Germany | Greece | Hungary | Italy | Ireland | Latvia | Lithuania | Luxembourg | Netherlands | Norway | Poland | Portugal | Romania | Slovakia | Slovenia | Spain | Sweden | Switzerland | UK  |     |     |
|---------------------------------|---------|---------|----------|--------|----------------|---------|---------|---------|--------|---------|--------|---------|-------|---------|--------|-----------|------------|-------------|--------|--------|----------|---------|----------|----------|-------|--------|-------------|-----|-----|-----|
| <i>Acanthis flammea</i>         | Yes     |         |          |        | Yes            | Yes     |         | Yes     |        | Yes     |        |         | Yes   | Yes     |        |           |            | Yes         | Yes    |        |          |         |          |          | Yes   | Yes    | Yes         | Yes |     |     |
| <i>Actitis hypoleucos</i>       |         |         |          |        | Yes            |         |         | Yes     | Yes    |         |        |         |       |         |        |           |            |             | Yes    | Yes    | Yes      |         |          |          | Yes   | Yes    | Yes         | Yes |     |     |
| <i>Anthus pratensis</i>         |         | Yes     |          |        | Yes            | Yes     | Yes     | Yes     | Yes    | Yes     |        |         |       | Yes     | Yes    | Yes       |            | Yes         | Yes    | Yes    | Yes      |         |          |          |       | Yes    | Yes         | Yes | Yes |     |
| <i>Anthus trivialis</i>         | Yes     | Yes     |          |        | Yes            | Yes     | Yes     | Yes     | Yes    | Yes     |        | Yes     | Yes   |         | Yes    | Yes       | Yes        | Yes         | Yes    | Yes    |          | Yes     | Yes      | Yes      | Yes   | Yes    | Yes         | Yes | Yes |     |
| <i>Bonasa bonasia</i>           |         |         |          |        |                |         | Yes     | Yes     |        |         |        |         |       |         | Yes    |           |            |             |        |        |          | Yes     | Yes      | Yes      | Yes   | Yes    | Yes         | Yes |     |     |
| <i>Calcarius lapponicus</i>     |         |         |          |        |                |         | Yes     | Yes     |        |         |        |         |       |         |        |           |            |             | Yes    |        |          |         |          |          | Yes   | Yes    | Yes         | Yes |     |     |
| <i>Carpodacus</i>               |         |         |          |        |                |         | Yes     | Yes     |        |         |        |         |       |         |        |           |            |             |        |        |          |         |          |          |       | Yes    | Yes         | Yes | Yes |     |
| <i>erythrinus</i>               |         |         |          |        | Yes            |         | Yes     | Yes     |        |         |        |         |       |         | Yes    |           |            |             |        |        | Yes      |         | Yes      |          |       | Yes    | Yes         | Yes | Yes |     |
| <i>Certhia familiaris</i>       | Yes     | Yes     |          |        | Yes            | Yes     | Yes     | Yes     | Yes    | Yes     |        |         | Yes   | Yes     | Yes    |           |            |             |        |        | Yes      |         | Yes      |          |       | Yes    | Yes         | Yes | Yes |     |
| <i>Dryocopus martius</i>        | Yes     | Yes     |          |        | Yes            | Yes     | Yes     | Yes     | Yes    | Yes     |        | Yes     | Yes   | Yes     | Yes    |           |            |             | Yes    | Yes    | Yes      |         | Yes      | Yes      | Yes   | Yes    | Yes         | Yes | Yes |     |
| <i>Emberiza rustica</i>         |         |         |          |        |                |         | Yes     | Yes     |        |         |        |         |       |         |        |           |            |             |        |        |          |         |          |          | Yes   | Yes    | Yes         | Yes | Yes |     |
| <i>Emberiza</i>                 |         |         |          |        |                |         |         |         |        |         |        |         |       |         |        |           |            |             |        |        |          |         |          |          |       |        |             |     |     |     |
| <i>schoeniclus</i>              |         | Yes     |          |        | Yes            | Yes     |         | Yes     | Yes    | Yes     |        | Yes     |       | Yes     | Yes    |           |            | Yes         | Yes    | Yes    |          |         | Yes      |          |       | Yes    | Yes         | Yes | Yes |     |
| <i>Ficedula hypoleuca</i>       |         |         |          |        | Yes            | Yes     | Yes     | Yes     | Yes    | Yes     |        |         |       |         | Yes    | Yes       |            |             | Yes    | Yes    | Yes      |         |          |          |       | Yes    | Yes         | Yes | Yes |     |
| <i>Fringilla montifringilla</i> |         |         |          |        |                |         | Yes     | Yes     |        |         |        |         |       |         | Yes    | Yes       |            |             | Yes    | Yes    |          |         |          |          | Yes   | Yes    | Yes         | Yes | Yes |     |
| <i>Gallinago gallinago</i>      |         |         |          |        | Yes            | Yes     | Yes     | Yes     |        | Yes     |        |         |       |         | Yes    |           |            | Yes         | Yes    | Yes    |          |         |          |          |       | Yes    | Yes         | Yes | Yes |     |
| <i>Grus grus</i>                |         |         |          |        |                |         | Yes     | Yes     |        | Yes     |        |         |       |         | Yes    | Yes       |            | Yes         | Yes    | Yes    |          |         |          |          |       | Yes    | Yes         | Yes | Yes |     |
| <i>Haematopus</i>               |         |         |          |        |                |         |         |         |        |         |        |         |       |         |        |           |            |             |        |        |          |         |          |          |       |        |             |     |     |     |
| <i>ostralegus</i>               |         |         |          |        |                | Yes     |         | Yes     |        |         |        |         |       |         |        |           |            | Yes         | Yes    |        |          |         |          |          |       | Yes    | Yes         | Yes | Yes |     |
| <i>Larus ridibundus</i>         |         |         |          |        | Yes            |         |         |         | Yes    | Yes     |        |         |       |         |        |           |            | Yes         | Yes    |        |          |         |          |          | Yes   | Yes    | Yes         | Yes | Yes |     |
| <i>Luscinia svecica</i>         |         |         |          |        |                |         | Yes     | Yes     |        |         |        |         |       |         |        |           |            |             | Yes    |        |          |         |          |          | Yes   | Yes    | Yes         | Yes | Yes |     |
| <i>Lyrurus tetrrix</i>          |         |         |          |        |                |         | Yes     | Yes     |        |         |        |         |       |         | Yes    |           |            |             | Yes    |        |          |         |          |          | Yes   | Yes    | Yes         | Yes | Yes |     |
| <i>Nucifraga</i>                |         |         |          |        |                |         |         |         |        |         |        |         |       |         |        |           |            |             | Yes    |        |          |         |          |          | Yes   | Yes    | Yes         | Yes | Yes |     |
| <i>caryocatactes</i>            | Yes     |         |          |        | Yes            |         | Yes     | Yes     |        |         |        |         | Yes   | Yes     |        |           |            |             |        |        |          |         |          |          |       | Yes    | Yes         | Yes | Yes |     |
| <i>Numenius arquata</i>         |         |         |          |        | Yes            | Yes     | Yes     | Yes     | Yes    | Yes     |        |         |       |         |        |           |            | Yes         | Yes    |        |          |         |          |          |       | Yes    | Yes         | Yes | Yes |     |
| <i>Phylloscopus</i>             |         |         |          |        |                |         |         |         |        |         |        |         |       |         |        |           |            |             |        |        |          |         |          |          |       |        |             |     |     |     |
| <i>trochilus</i>                | Yes     | Yes     |          |        | Yes            | Yes     | Yes     | Yes     | Yes    | Yes     |        | Yes     |       | Yes     | Yes    | Yes       | Yes        | Yes         | Yes    | Yes    |          |         | Yes      |          |       | Yes    | Yes         | Yes | Yes | Yes |
| <i>Pluvialis apricaria</i>      |         |         |          |        |                |         | Yes     | Yes     |        |         |        |         |       |         |        |           |            |             |        |        |          |         |          |          |       | Yes    | Yes         | Yes | Yes |     |
| <i>Poecile montanus</i>         | Yes     | Yes     |          |        | Yes            | Yes     | Yes     | Yes     | Yes    | Yes     |        |         | Yes   | Yes     | Yes    |           |            | Yes         | Yes    | Yes    | Yes      |         | Yes      |          |       | Yes    | Yes         | Yes | Yes |     |
| <i>Prunella modularis</i>       | Yes     | Yes     |          |        | Yes            | Yes     | Yes     | Yes     | Yes    | Yes     |        | Yes     | Yes   | Yes     | Yes    | Yes       | Yes        | Yes         | Yes    | Yes    | Yes      |         | Yes      |          | Yes   | Yes    | Yes         | Yes | Yes |     |
| <i>Pyrrhula pyrrhula</i>        | Yes     | Yes     |          |        | Yes            | Yes     | Yes     | Yes     | Yes    | Yes     |        |         | Yes   | Yes     | Yes    |           |            | Yes         | Yes    | Yes    | Yes      |         | Yes      |          | Yes   | Yes    | Yes         | Yes | Yes |     |
| <i>Regulus regulus</i>          | Yes     | Yes     |          |        | Yes            | Yes     | Yes     | Yes     | Yes    | Yes     |        | Yes     | Yes   | Yes     | Yes    |           | Yes        | Yes         | Yes    | Yes    | Yes      |         | Yes      |          | Yes   | Yes    | Yes         | Yes | Yes |     |
| <i>Saxicola rubetra</i>         | Yes     | Yes     |          |        | Yes            | Yes     | Yes     | Yes     | Yes    | Yes     |        | Yes     | Yes   | Yes     | Yes    | Yes       | Yes        | Yes         | Yes    | Yes    | Yes      |         | Yes      | Yes      | Yes   | Yes    | Yes         | Yes | Yes |     |
| <i>Spinus spinus</i>            | Yes     |         |          |        | Yes            | Yes     | Yes     | Yes     | Yes    | Yes     |        |         | Yes   | Yes     | Yes    |           |            | Yes         | Yes    | Yes    | Yes      |         | Yes      | Yes      | Yes   | Yes    | Yes         | Yes | Yes |     |
| <i>Tringa glareola</i>          |         |         |          |        |                |         |         | Yes     |        |         |        |         |       |         |        |           |            |             |        |        |          |         |          |          |       | Yes    | Yes         | Yes | Yes |     |
| <i>Tringa nebularia</i>         |         |         |          |        |                |         |         | Yes     |        |         |        |         |       |         |        |           |            |             |        |        |          |         |          |          |       | Yes    | Yes         | Yes | Yes |     |
| <i>Tringa ochropus</i>          |         |         |          |        |                |         |         | Yes     |        |         |        |         |       |         |        |           |            |             |        |        |          |         |          |          |       | Yes    | Yes         | Yes | Yes |     |
| <i>Tringa totanus</i>           |         |         |          |        |                | Yes     | Yes     | Yes     | Yes    | Yes     |        | Yes     |       |         |        |           |            | Yes         | Yes    | Yes    | Yes      |         |          |          |       | Yes    | Yes         | Yes | Yes |     |
| <i>Turdus iliacus</i>           |         |         |          |        |                |         | Yes     | Yes     |        |         |        |         |       |         |        |           |            |             |        |        |          |         |          |          |       | Yes    | Yes         | Yes | Yes |     |
| <i>Turdus pilaris</i>           | Yes     | Yes     |          |        | Yes            | Yes     | Yes     | Yes     | Yes    | Yes     |        |         | Yes   | Yes     | Yes    | Yes       |            |             | Yes    | Yes    |          |         | Yes      | Yes      | Yes   | Yes    | Yes         | Yes | Yes |     |

Table S10: 35 species selected for the computation of the cold-dweller multispecies index for each county.

Supplementary Information Appendix 6

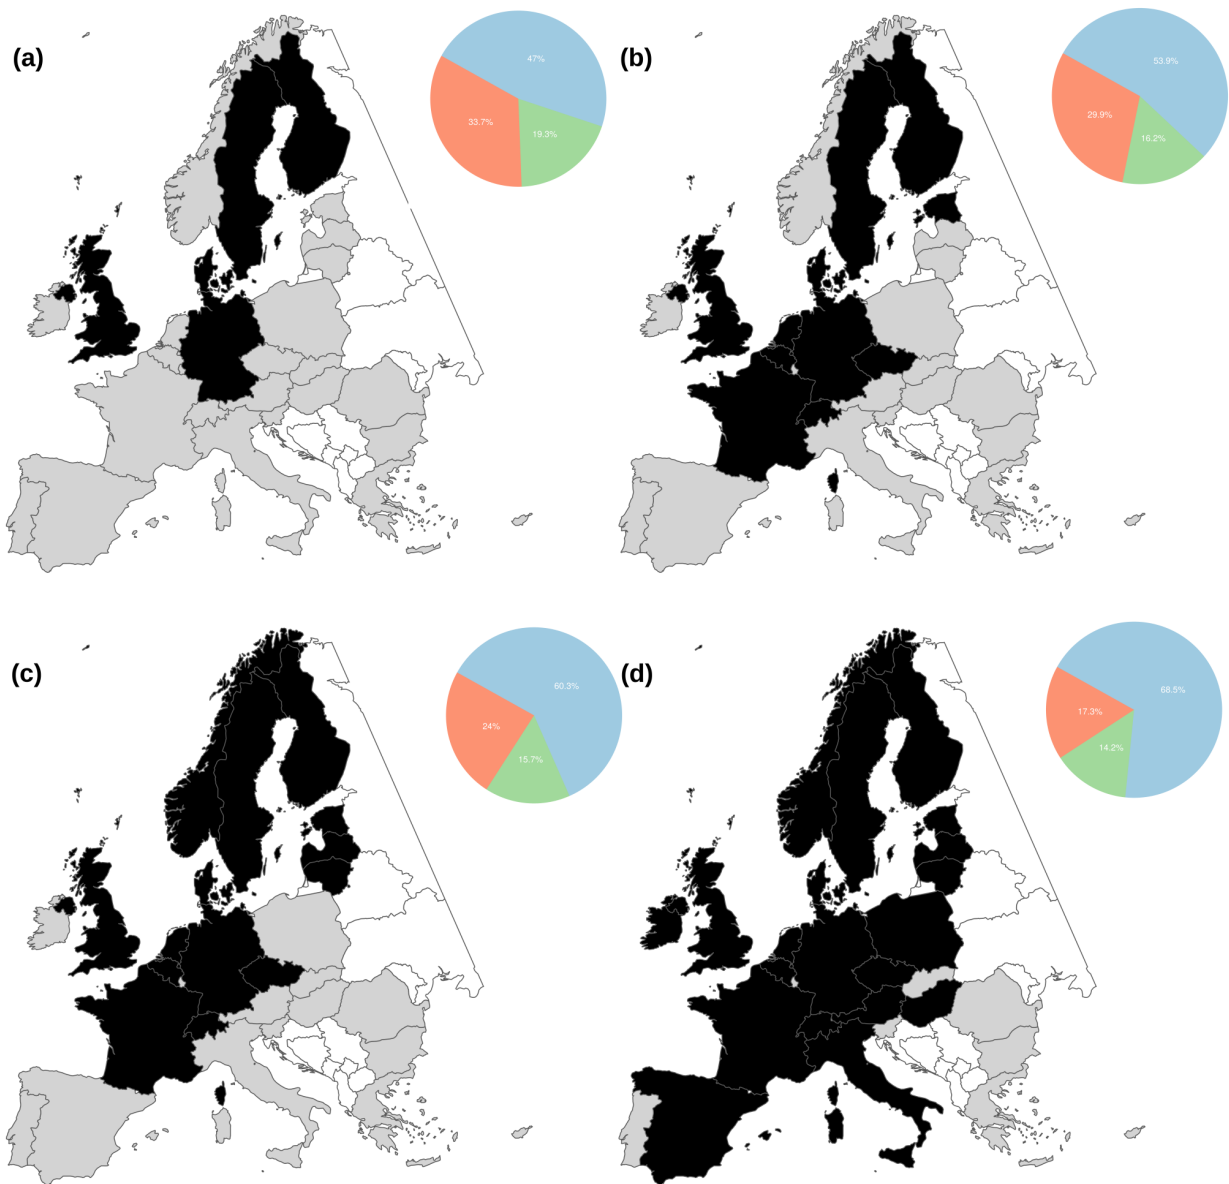

Figure S6: Impact of time period on country distribution and species trends. a) Trends and countries, 1981-2016. b) Trends and countries, 1991-2016. c) Trends and countries, 1996-2016 . d) Trends and countries, 2001-2016. Countries in grey were involved in the PanEuropean Common Bird Monitoring Scheme (PECBMS) in 2016 and in black countries in PECBMS during the period considered. Pie charts show the overall distribution of species trend between increasing (green), decreasing (orange) and non-significant (blue) trends. Overall, the best compromise between spatial coverage and temporal variability



(as few non-significant trends as possible) is between 1996 and 2016 with 39.7 % of significantly non-stable trends (24 % decreasing and 15.7% increasing).

## Supplementary Information Appendix 7

Overall, we found a majority of unidirectional forcings from pressures to species, but bidirectional forcings between species and pressures and forcing from species to pressure have also been found (Tab. S10). Influence of species on pressures are false positive. In bidirectional forcing, a significant influence of species on pressures might be due to a strong synchrony between species and pressure time-series (3). One-way influence of species on pressures (i.e. when no forcing is found from pressure to species) are due to data limitation (4). Acknowledging the limits of the data used in this study, we used two different tests to assess the quality and consistency of our approach: we tested the influence of removing each country in the detection of pressure influence and we used a test of false negative and false positive detection rate when the proportion and magnitude of influence between time-series change.

| Pressure         | Pressure -> Species                                                                                                  | Pressure <-> Species                                                                                               | Pressure <- Species | No forcing |
|------------------|----------------------------------------------------------------------------------------------------------------------|--------------------------------------------------------------------------------------------------------------------|---------------------|------------|
| High-input cover | farm 33 (8 species)                                                                                                  | farmland 18 (2 species)                                                                                            | farmland 31         | 86         |
| Forest cover     | 30 (3 forest species)                                                                                                | 1 (1 forest species)                                                                                               | 5                   | 132        |
| Urbanisation     | 21 (3 species)                                                                                                       | urban 8 (4 urban species)                                                                                          | 17                  | 122        |
| Temperature      | 50 (10 hot dweller positively influenced, 4 hot dweller negatively influenced, 1 cold dweller positively influenced) | 8 (1 hot dweller positively influenced, 1 hot dweller negatively influenced, 1 cold dweller negatively influenced) | 13                  | 97         |

Table S11: Number of species affected by pressure (Pressure -> Species), bidirectional forcing (Pressure <-> Species), species affecting pressure (Pressure <- Species) and non forcing for each pressure.

### 1. One-by-one country removal test

We repeated the estimation of each pressure influence on each species while successively removing each country. Each time, we therefore used species and pressure time-series for the 27 other countries to which we applied the framework described in the main manuscript. We then analysed whether removing a given country impacted the number of species affected by a pressure (Fig. S6).

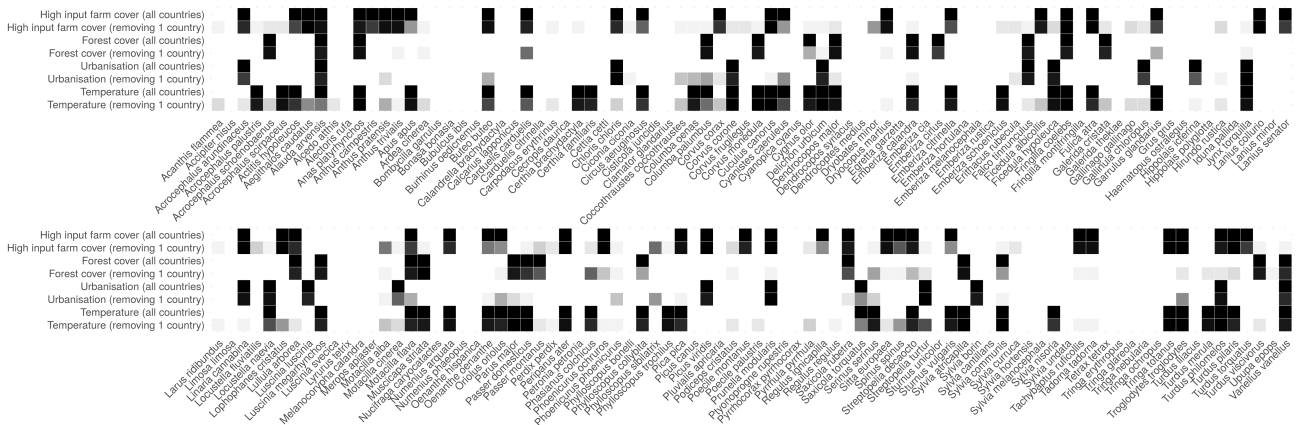

Figure S7: Influence of country removal in detecting pressure influence on species. For each pressure except for temperature (due to computational time), the influence calculated using time-series from all countries (*all countries*, black square when the influence is significant, white otherwise) are compared to the average influence obtained when successively removing each country (*removing 1 country*, grey scale proportional to the number of times the species was found influenced when removing successively each country). For instance, the Coal tit (*Periparus ater*) is affected by temperature when data from all countries are used (black square in the seventh row) and this remains valid when calculated on data in which each country is successively removed (black square in the eighth row). Conversely, the common redpoll (*Acanthis flammea*) is not affected by temperature when data from all countries are used (white square in the seventh row) but can be detected as being affected by temperature when some countries are successively removed (grey square in the eighth row).

| Pressure              | Affected with all countries or when removing one country. | Not significantly affected, neither with all countries nor when removing one country. | Not significantly affected with all countries but significantly affected when removing one country (at least for one of the countries). |
|-----------------------|-----------------------------------------------------------|---------------------------------------------------------------------------------------|-----------------------------------------------------------------------------------------------------------------------------------------|
| High-input farm cover | 50                                                        | 69                                                                                    | 49                                                                                                                                      |
| Forest cover          | 25                                                        | 117                                                                                   | 26                                                                                                                                      |
| Urbanisation          | 21                                                        | 123                                                                                   | 26                                                                                                                                      |
| Temperature           | 55                                                        | 73                                                                                    | 40                                                                                                                                      |

Table S12: Number of species affected by each pressure when using all countries or when removing successively each country. Species found significantly affected when using all countries were also found significantly affected when removing successively each country. Most of the species not significantly affected when using all countries were not significantly affected when removing a given country. Some species not significantly affected when using all countries were found significantly affected when removing a given country.

Considering the results from a country-based perspective, we found three cases: countries without which fewer species are found significantly affected by the pressure (case 1), countries without which more species are found significantly affected by the pressure (case 2) and countries without which the number of species significantly affected by the pressure stayed the same (case 3). Removing time-series from a given country can change the estimation of the pressure influence by affecting the length of the time-series used and by increasing or decreasing the proportion of time-series with information. For instance, if a country where the influence of the considered pressure is high is removed, detecting the influence from the reduced dataset will be more difficult (see case 1). Conversely, the removal of time-series from a country where there is no or a weak influence of the pressure on the species may increase the proportion of time-series where the pressure influence is visible and therefore it will make it easier to detect the pressure influence (see case 2). Finally, if the removed country was not more or less informative than the average, its removal may not impact the final estimate (case 3).

Considering the results from a species-based perspective, we also found three cases (Tab. S11 and Fig. S6). Case 1: all species significantly affected when using all countries were also found to be influenced by pressure when removing a given country. Case 2: most of the species not significantly affected by the considered pressure were never found affected when removing a country. Case 3: some of the species not significantly affected when using all countries were found to be influenced when removing a given country. Cases 1 and 2 were expected and depict the consistency of our results when removing countries one-by-one. Case 3 corresponds to false negatives where the information on the pressure influence on the species seems to be present in the dataset but is diluted by data from some countries. Overall, our approach is conservative as we focused on pressure influences on species that are strong enough to not be diluted when considering all countries and shared between enough countries to not disappear when some countries are removed.

## 2. Testing the effect of pressure influence variability on the false negative and false positive rates.

We analysed the false positive and false negative rates of our method for each pressure influence. Initially, the multispatial CCM method had been tested on time-series simulated with an interaction strength constant across plots and on an empirical example<sup>53</sup> was based on analysing plant-plant competition in spatially close plots and thus the interaction strength was not expected to differ substantially between plots. In our study, each of the pressures analysed could have a different influence on the different populations of a given species as our spatial replicates are countries (*i.e.* spatial replicates are not spatially close). We therefore tested the effect of variability in pressure influence between countries on the false negative and false positive rates. Hence, we analysed the average false positive and false negative rates by using simulated data which mimic species-pressure datasets (long pseudo-time-series of one species and one pressure reconstructed from national time-series). To do so, we simulated data using the R function *make\_ccm\_data* from the R package *multispatialCCM*<sup>(4)</sup>. This provides a simulated dataset with two time-series from a two species competition model where species *B* negatively affect species *A* but species *A* does not affect species *B*. In our case, *B* corresponds to the pressure and *A*

to the species. This function admits several parameters to model the simulated dataset as close as possible to the observed species-pressure dataset. The *number of sequential observations* corresponded to the average times-series length by country and has been set to 10. The *total number of time-series* corresponded to the average number of countries and has been set to 28. Hereafter we focused on a third parameter which is the *forcing strength* between *B* and *A*.

We tested the effect of the variability in the *forcing strength* (i.e. pressure influence) among countries in three steps.

First, we tested the effect of the proportion of time-series without forcing strength on the false negative and false positive detection rates. We used six different proportions of time-series with a forcing strength set to 0, evenly spaced from 0 to 100 % (0 %, 20 %, 40 %, 60 %, 80 %, 100 %). There are two kinds of false positive rates. The first one corresponds to the number of times a significant effect was found from *B* to *A* although there was no effect (100 % of time-series with a forcing strength set to 0) among the number of trials. The second one corresponds to the number of times a significant effect was found from *A* to *B*, although *A* is not supposed to influence *B*. False negative rates correspond to the number of times no significant effect was found between *B* and *A* although there was an effect (between 20 % and 100 % of time-series with a forcing strength set to 1.25 (4)) among the number of trials.

In a second step, we tested the effects of the variability in the forcing strength by drawing values from five different intervals centred on 1.25 ([1.2, 1.3], [0.9, 1.6], [0.6, 1.9], [0.3, 2.2], [0, 2.5]).

Finally in a third step, we tested the effect of the intensity of forcing strength on its detectability. We used a forcing strength different from 0 for only one country among the 28 used to build the long pseudo-time-series. For that country, we tested five different values of the forcing strength, evenly spaced from 0.3 to 2.5 (0.30, 0.85, 1.40, 1.95, 2.50). Forcing strengths in all other countries were set to 0.

Each of these three tests was conducted 1000 times. This results in 16,000 ((6 + 5 + 5) x 1000) combinations to which was applied the multispatial CCM with 100 bootstrap iterations (due to computing time<sup>53</sup>) corresponding to a total of 1.6 million individual multispatial tests.

| Percentage of countries with forcing strength set to 0                                                    | 0 %   | 20 %  | 40 %  | 60 %  | 80 %  | 100 % |
|-----------------------------------------------------------------------------------------------------------|-------|-------|-------|-------|-------|-------|
| False negative rate of significant effect from B to A (except from the last column: false positive rate). | 0.006 | 0.311 | 0.375 | 0.560 | 0.796 | 0.119 |

Table S13: Average false negative and false positive rates of significant effect from B to A for each proportion of time-series with forcing strength set to 0.

| Forcing strength in                                   | [1.2, 1.3] | [0.9, 1.6] | [0.6, 1.9] | [0.3, 2.2] | [0, 2.5] |
|-------------------------------------------------------|------------|------------|------------|------------|----------|
| False negative rate of significant effect from B to A | 0.239      | 0.264      | 0.502      | 0.493      | 0.323    |

Table S14: Average false negative rates of significant effect from B to A for each interval of forcing strength.

| Forcing strength (different from 0 in only one country) | 0.30  | 0.85  | 1.40  | 1.95  | 2.5   |
|---------------------------------------------------------|-------|-------|-------|-------|-------|
| False negative rate of significant effect from B to A   | 0.881 | 0.741 | 0.836 | 0.866 | 0.980 |

Table S15: Average false negative rates of significant effect from B to A for each forcing strength (different from 0 in only one country).

High false negative rates and low false positive rates (the average false positive rate of significant effect from A to B is 0.085) were consistent with previous results <sup>(4)</sup>. False negative rates decrease when the proportion of time-series with a non null influence of pressure increases (Tab. S12). False negative rates increase with the variability in pressure influence among countries (Tab. S13). When only one time-series has a non-null strength the strength value does not affect the detection rate which remains very low (Tab. S14). All together these results show that the approach used tends to detect only existing influence (low false positive rates, Tab. S12) but fails to detect existing influence when time-series are short or when strength variability is high. This may explain the low number

of species affected by urbanisation or forest cover. Moreover the higher number of species affected by high-input farm cover than by temperature although time-series were shorter for the first pressure may be the result of a stronger variability in the influence strength of temperature compared to a more stable influence strength of high-input farm cover.



## Supplementary Information Appendix 8

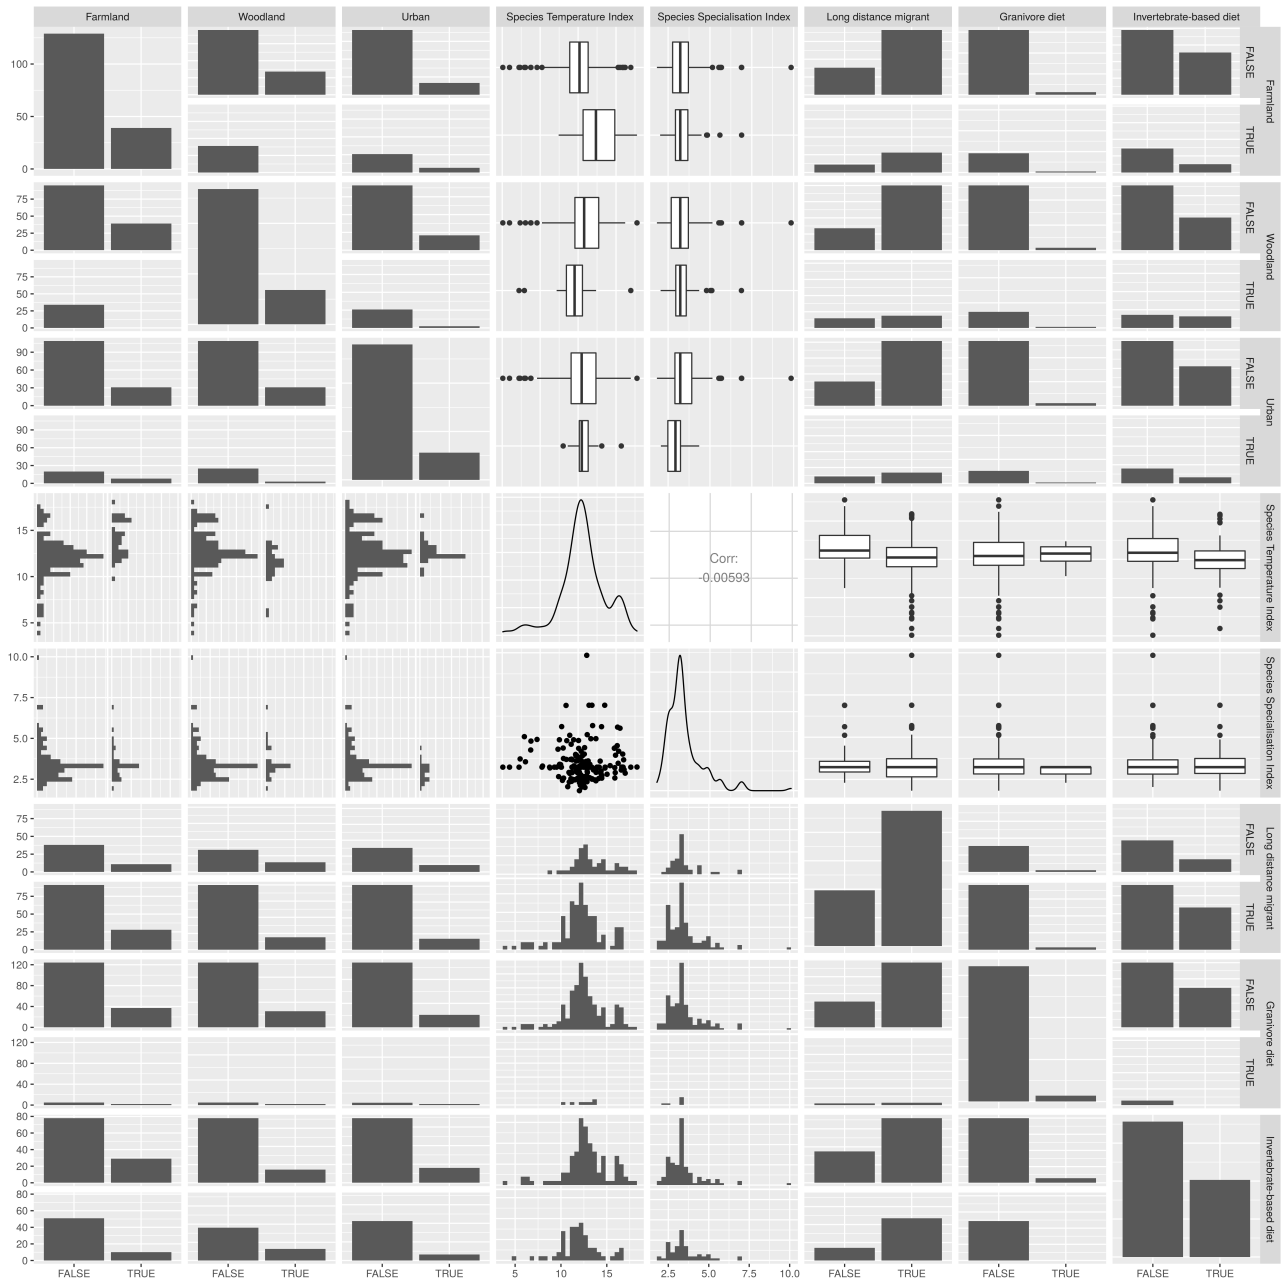

Figure S8: Density plots and correlations between species traits. Each dot represents a species.

### SI references:

1. R. Inger, *et al.*, Common European birds are declining rapidly while less abundant species' numbers are rising. *Ecol. Lett.* **18**, 28–36 (2015).
2. EEA, Farm structure, European Environment Agency, available at <https://ec.europa.eu/eurostat/fr/data/database> and see metadata for detail at [https://ec.europa.eu/eurostat/cache/metadata/en/ef\\_sims.htm](https://ec.europa.eu/eurostat/cache/metadata/en/ef_sims.htm). (2020).

3. G. Sugihara, *et al.*, Detecting causality in complex ecosystems. *Science* **338**, 496–500 (2012).
4. A. T. Clark, *et al.*, Spatial convergent cross mapping to detect causal relationships from short time series. *Ecology* **96**, 1174–1181 (2015).
